# Supplementary material for: Catecholase activity of Mannich-based dinuclear CuII complexes with theoretical modeling: new insight into the solvent role in the catalytic cycle
Source: Royal Society of Chemistry journal article supplement (doi:10.1039/c6nj00105j), 2016-01-01
Supplement: c6nj00105j1.pdf [file c6nj00105j1.pdf]

## Electronic Supplementary Information

### **Catecholase activity of Mannich-based dinuclear Cu<sup>II</sup> complexes with theoretical modeling: New insight into the solvent role in catalytic cycle<sup>†</sup>**

Ria Sanyal,<sup>a</sup> Priyanka Kundu,<sup>a</sup> Elena Rychagova,<sup>b,c</sup> Grigory Zhigulin,<sup>b</sup> Sergey Ketkov,<sup>b,c</sup> Bipinbhari Ghosh,<sup>d</sup> Shyamal Kumar Chattopadhyay,<sup>d</sup> Ennio Zangrando<sup>\*,e</sup> and Debasis Das<sup>\*a</sup>

<sup>a</sup>*Department of Chemistry, University of Calcutta, 92, A. P. C. Road, Kolkata – 700009, India. Fax: +913323519755; Tel: +913324837031; E-mail: dasdebasis2001@yahoo.com.*

<sup>b</sup>*G.A.Razuvaev Institute of Organometallic Chemistry RAS, 49 Tropinin St., 603950 Nizhny Novgorod, Russian Federation.*

<sup>c</sup>*N. I. Lobachevsky Nizhny Novgorod State University, Gagarin ave. 23, 603950 Nizhny Novgorod, Russian Federation.*

<sup>d</sup>*Department of Chemistry, Indian Institute of Engineering Science and Technology, Howrah 711103, India.*

<sup>e</sup>*Department of Chemical and Pharmaceutical Sciences, University of Trieste, Via L. Giorgieri 1, 34127 Trieste, Italy. E-mail: zangrando@units.it.*

## Table of contents

| <b>Fig. / Table</b> | <b>Legend</b>                   | <b>Page</b> |
|---------------------|---------------------------------|-------------|
| Fig. S1-S6          | FTIR                            | 3-5         |
| Fig. S7-S8          | <sup>1</sup> H NMR              | 6-7         |
| Fig. S9-S10         | TGA                             | 7-8         |
| Fig. S11-S16        | ELECTRONIC SPECTRA              | 8-11        |
| Fig. S17            | ORTEP                           | 11          |
| Fig. S18-S24        | CV AND DPV                      | 12-15       |
| Fig. S25-S26        | ESI-MS                          | 15-17       |
| Fig. S27-S28        | CONTROL EXPERIMENT              | 17-18       |
| Fig. S29            | CATECHOLASE (1)                 | 18          |
| Fig. S30-S33        | CATECHOLASE (4)                 | 19-20       |
| Fig. S34-S35        | KINETICS (1)                    | 21          |
| Fig. S36-S39        | KINETICS (4)                    | 22-23       |
| Fig. S40            | OVERLAY OF KINETIC PLOTS        | 24          |
| Fig. S41-S43        | SOLVENT DEPENDENCE              | 24-25       |
| Fig. S44-S45        | CATECHOLASE VS Cu...Cu DISTANCE | 26          |
| Fig. S46-S48        | CATALYTIC CYCLES                | 27-28       |
| Fig. S49            | DFT OPTIMISED STRUCTURES        | 29          |
| Table S1            | TGA                             | 30          |
| Table S2            | MOLAR CONDUCTANCE               | 30          |
| Table S3            | KINETIC PARAMETERS (3,5-DTBC)   | 30-31       |
| Table S4            | KINETIC PARAMETERS (TCC)        | 31          |
| Table S5            | LITERATURE SURVEY               | 32-33       |
| Table S6            | BOND DISTANCES (DFT)            | 34          |
| Table S7-S10        | OPTIMISED ΔE VALUES             | 34-36       |

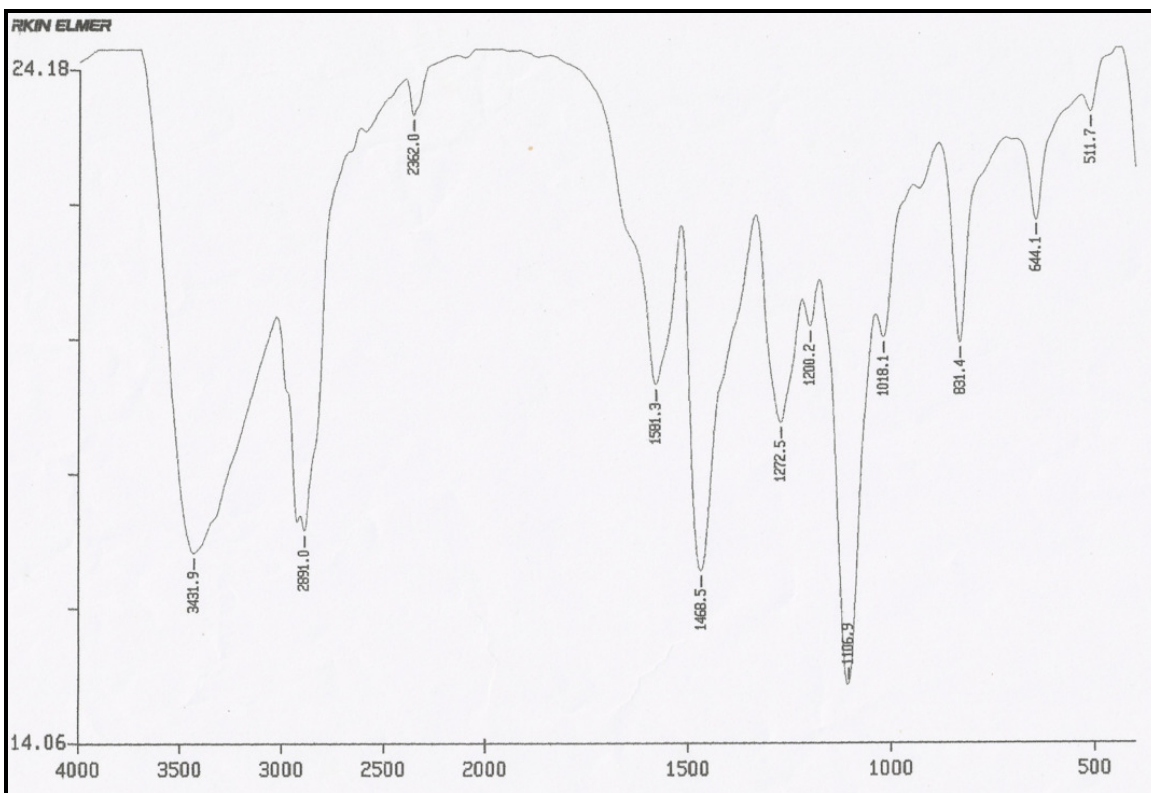

Fig. S1 FTIR spectra of ligand **HL1** in NaCl-plate.

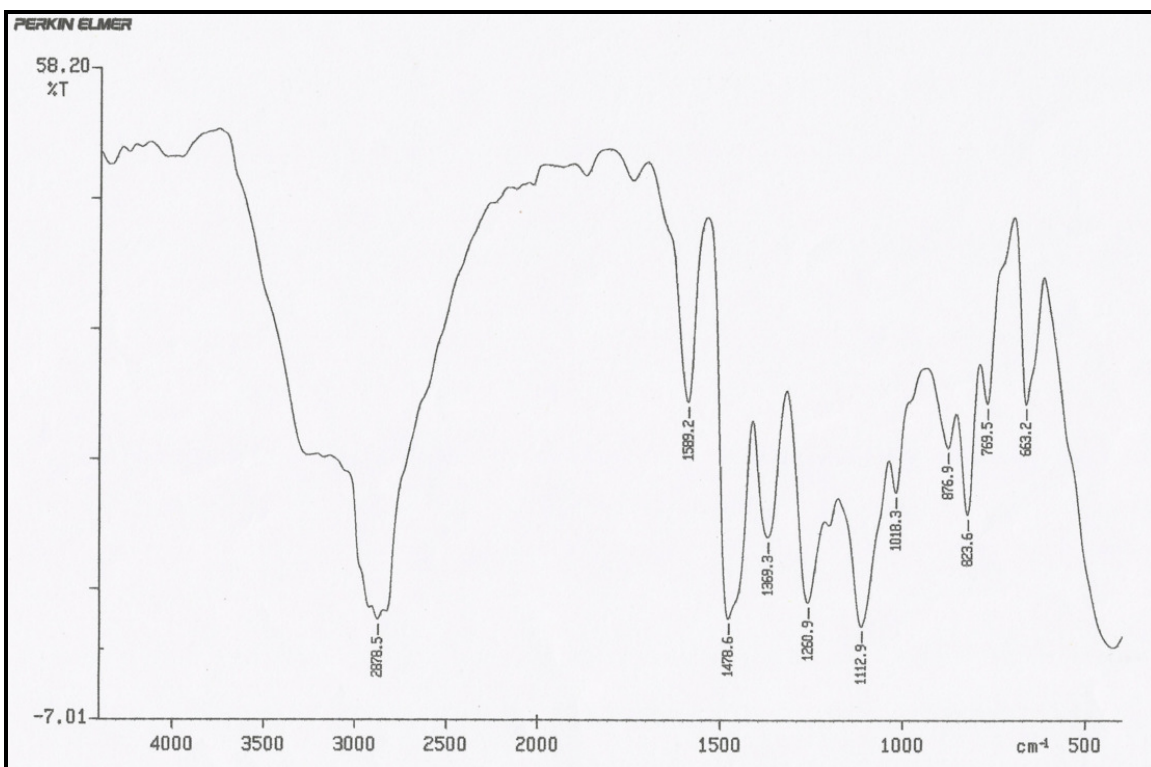

Fig. S2 FTIR spectra of ligand HL2 in NaCl-plate.

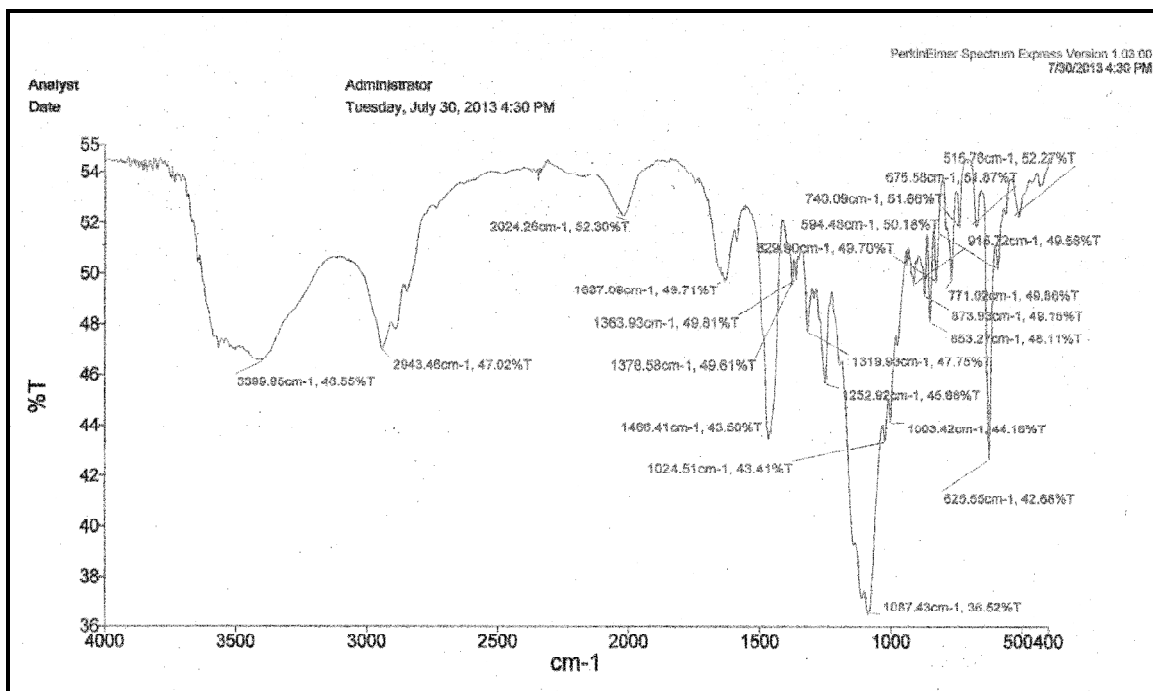

Fig. S3 FTIR spectrum of complex 1 in KBr pellet.

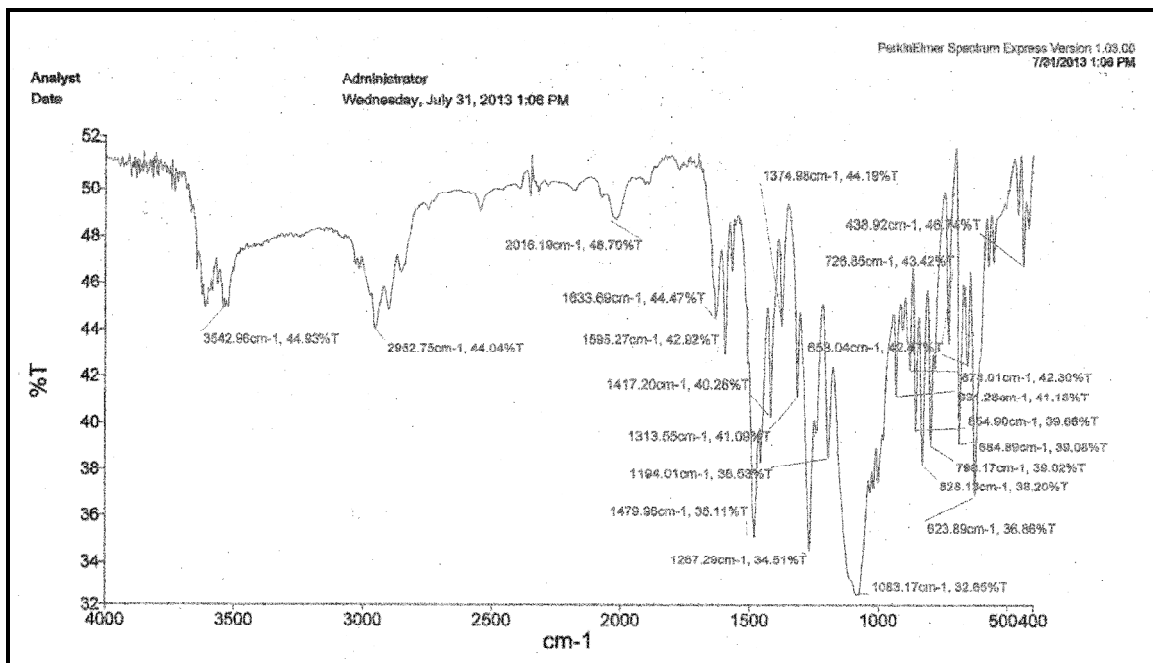

Fig. S4 FTIR spectrum of complex 2 in KBr pellet.

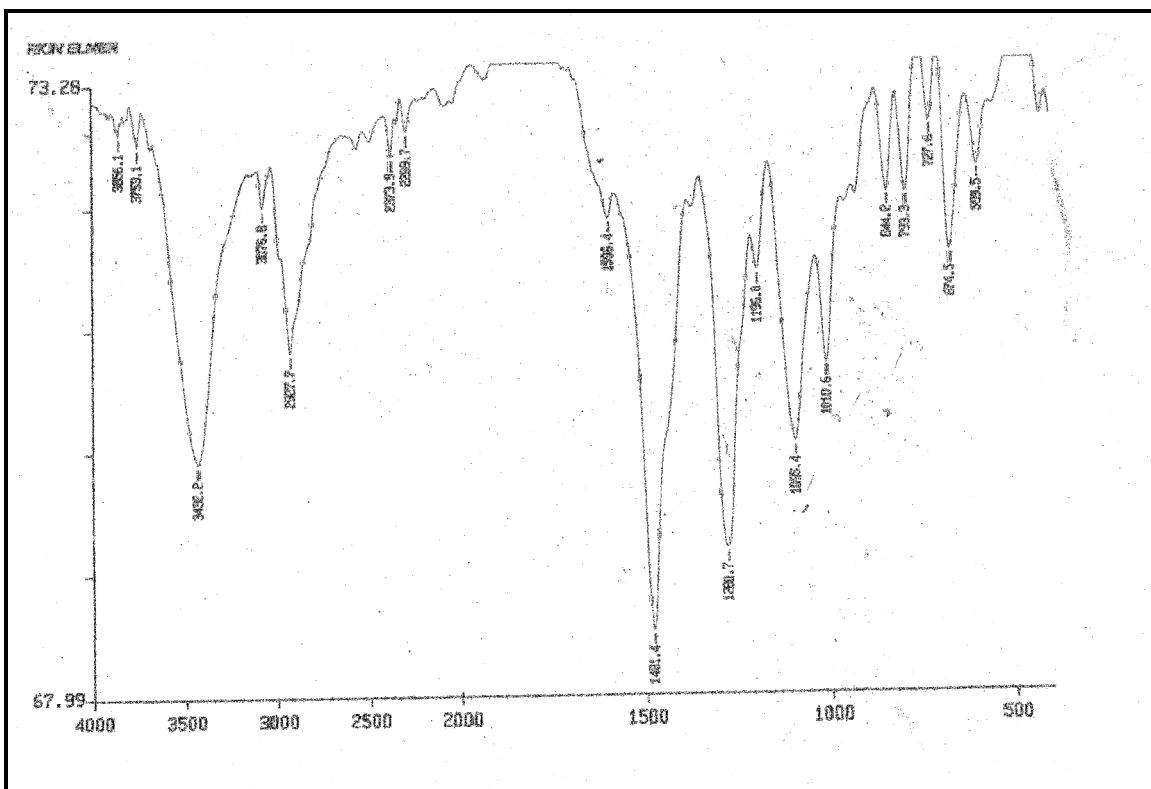

Fig. S5 FTIR spectrum of complex 3 in KBr pellet.

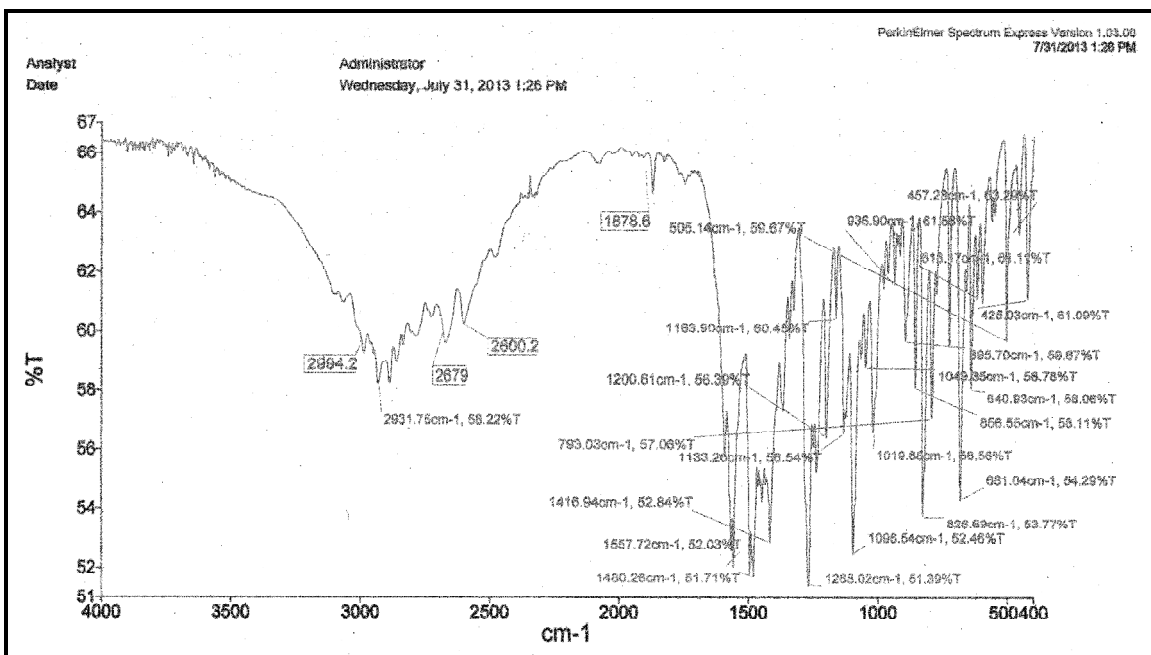

Fig. S6 FTIR spectrum of complex 4 in KBr pellet.

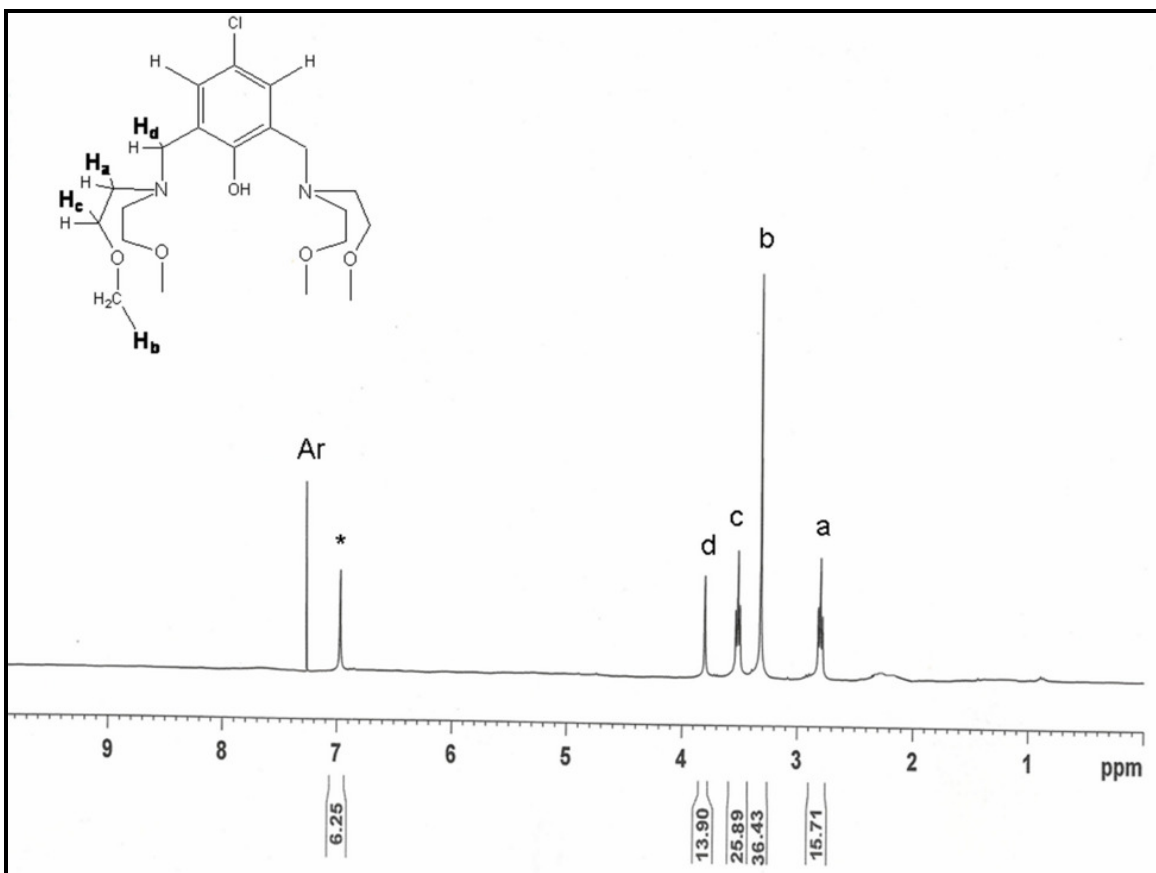

Fig. S7 <sup>1</sup>H-NMR of ligand **HL1** in CDCl<sub>3</sub> at 25°C (Solvent peak is marked as \*).

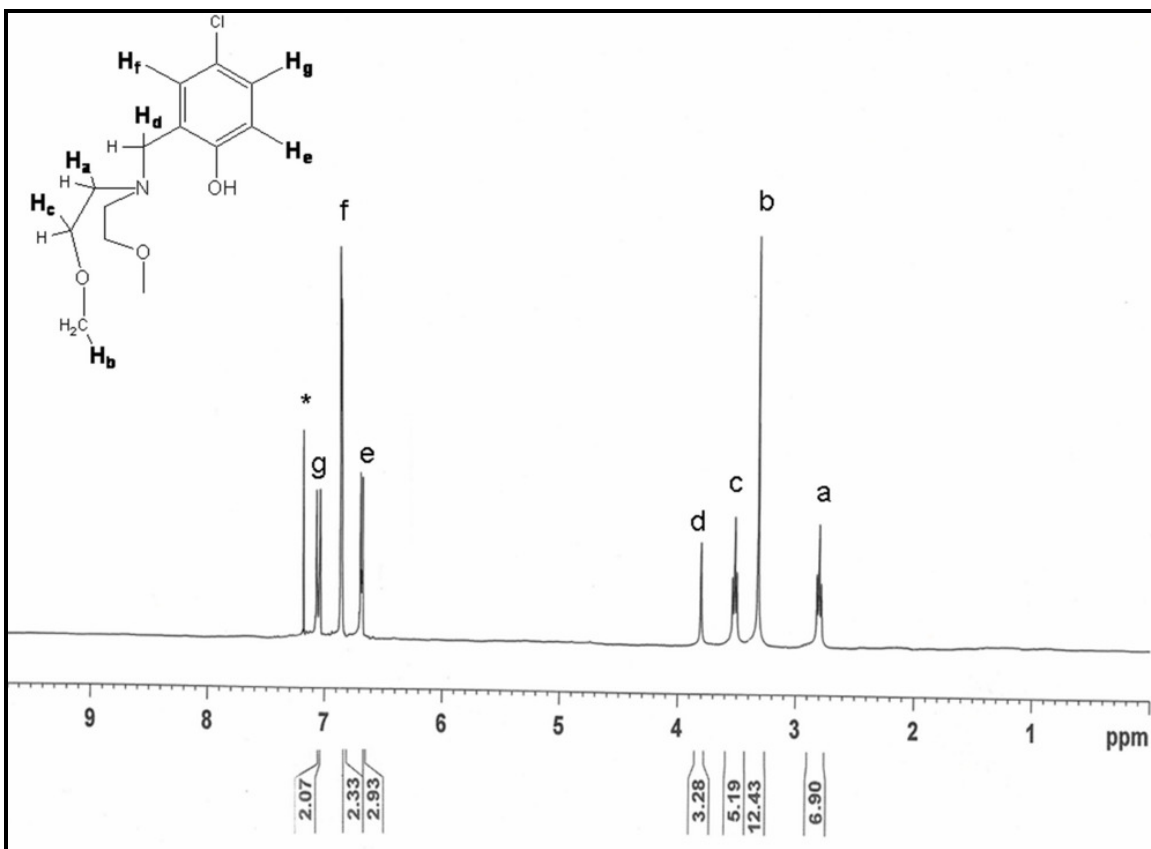

Fig. S8 <sup>1</sup>H-NMR of ligand HL2 in CDCl<sub>3</sub> at 25°C (Solvent peak is marked as \*).

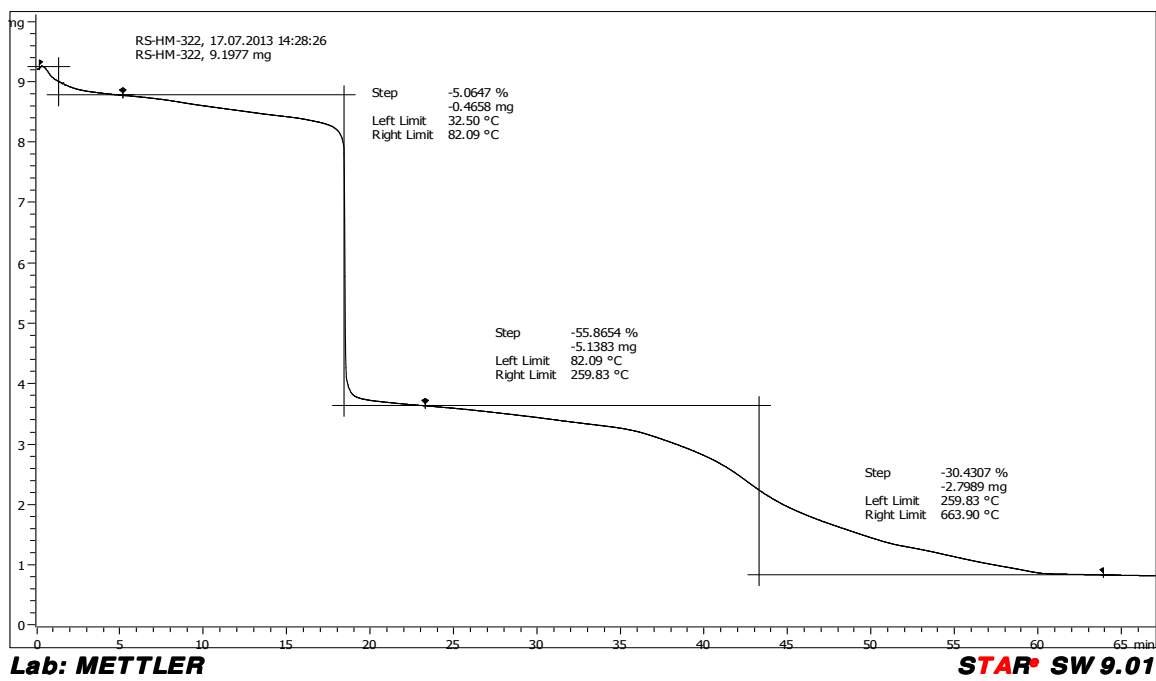

Fig. S9 TGA curve of complex 3.

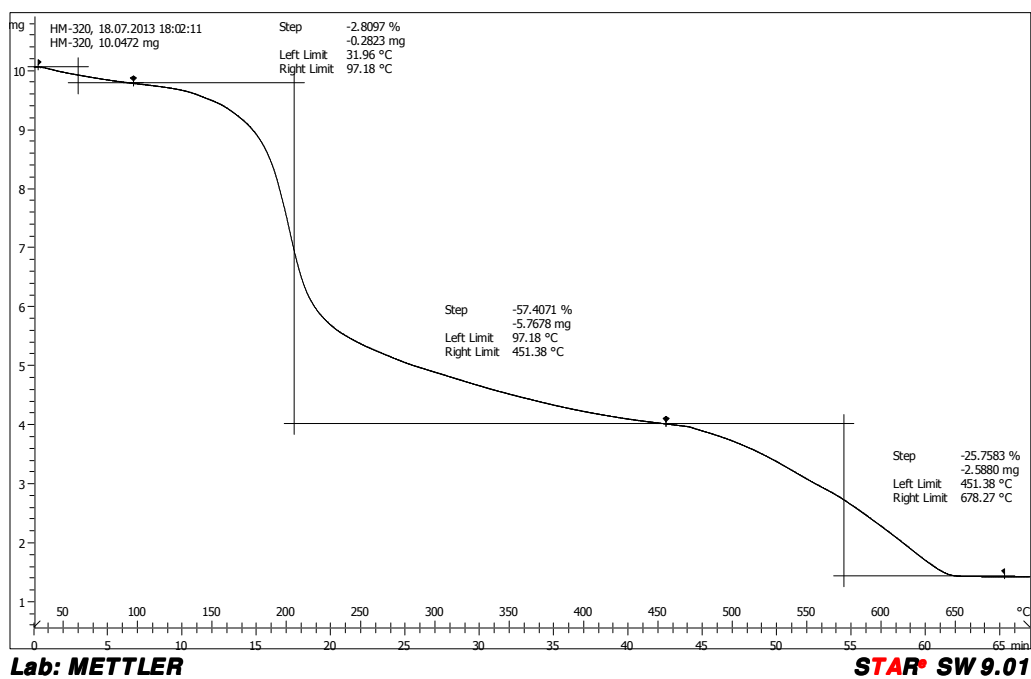

Fig. S10 TGA curve of complex 4.

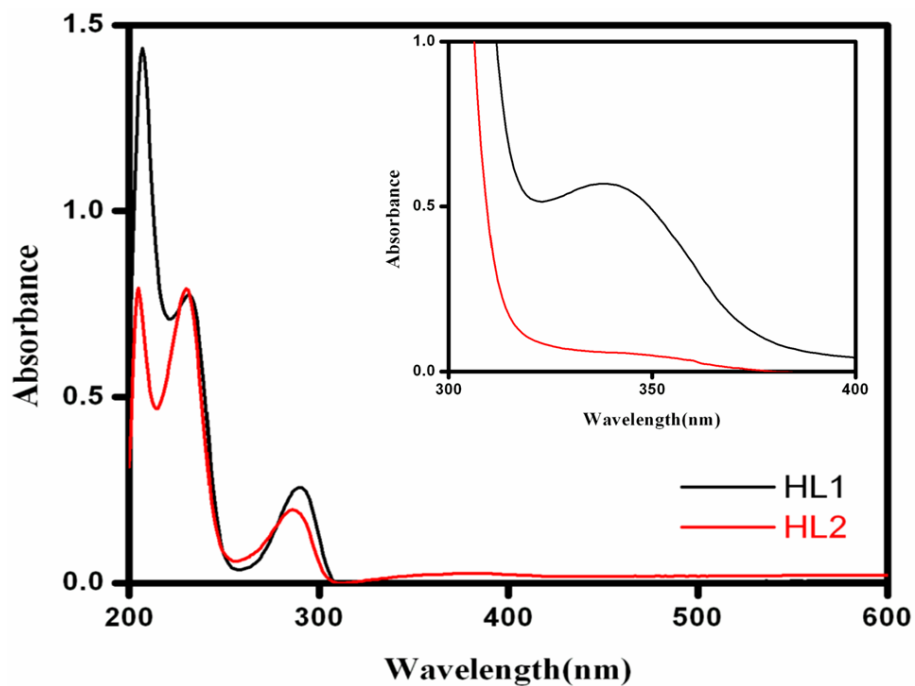

Fig. S11 Electronic spectra of the free ligands in acetonitrile at 25°C.



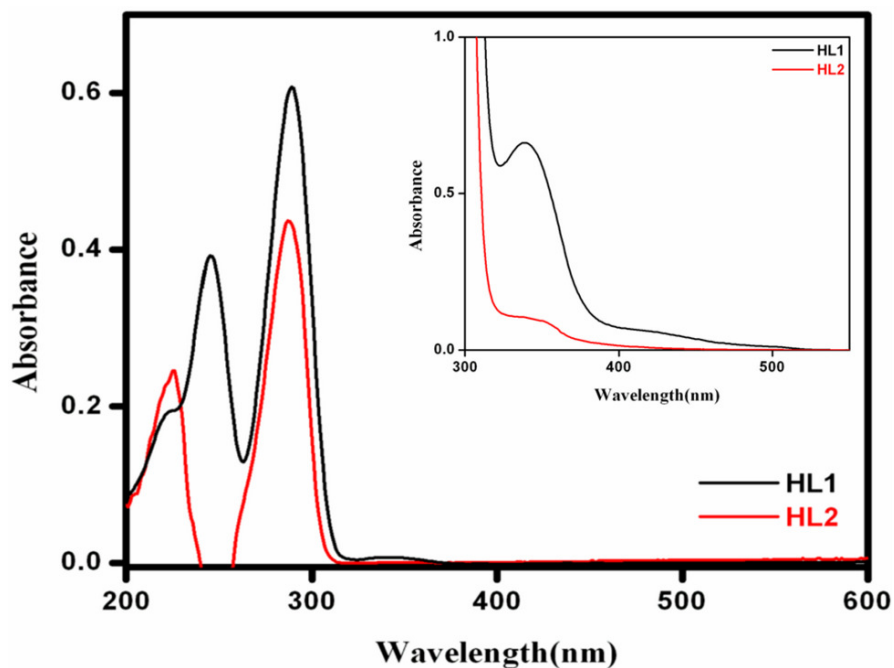

**Fig. S12** Electronic spectra of the free ligands in DMSO at 25°C.

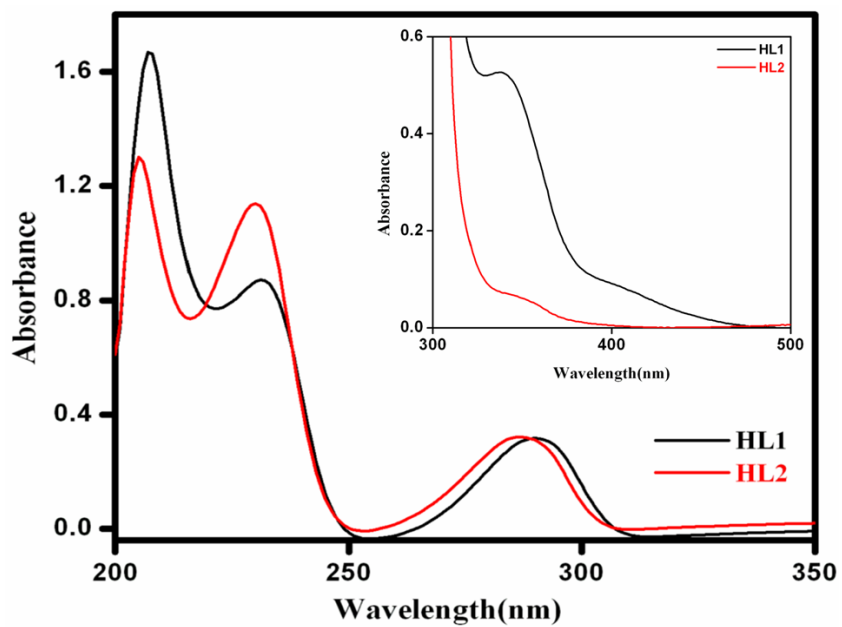

**Fig. S13** Electronic spectra of the free ligands in methanol at 25°C.

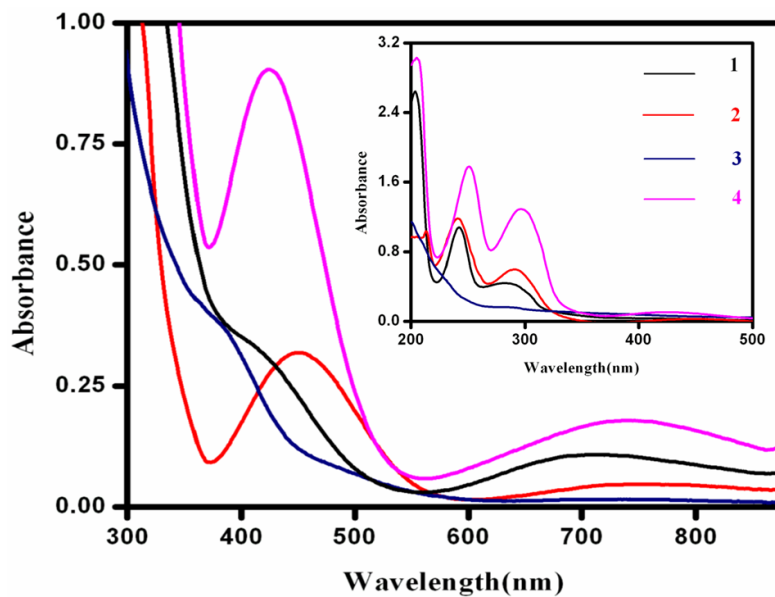

**Fig. S14** Electronic spectra of  $10^{-3}$  M acetonitrile solution of complexes **1-4** and in the inset of  $10^{-4}$  M solution.

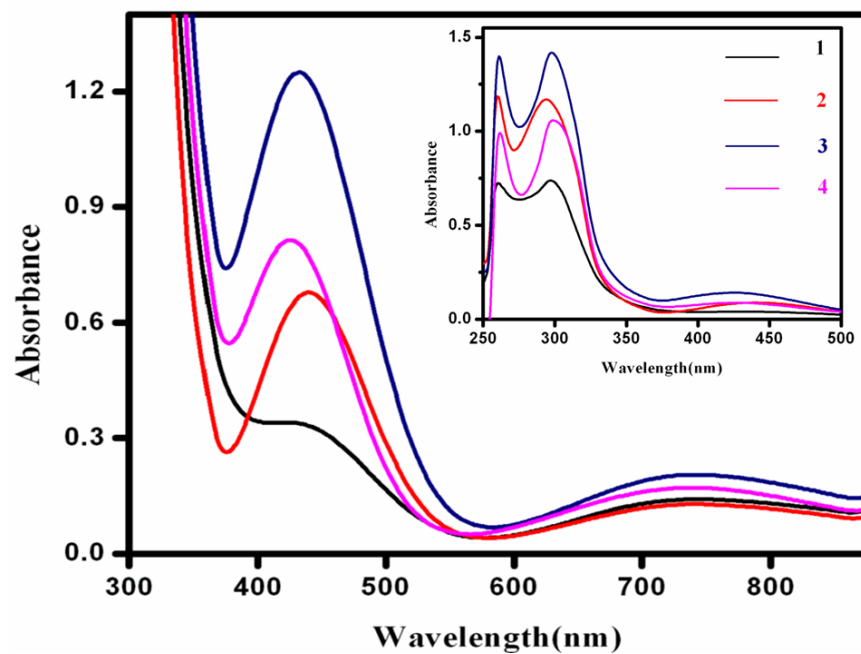

**Fig. S15** Electronic spectra of  $10^{-3}$  M DMSO solution of complexes **1-4** and in the inset of  $10^{-4}$  M solution.

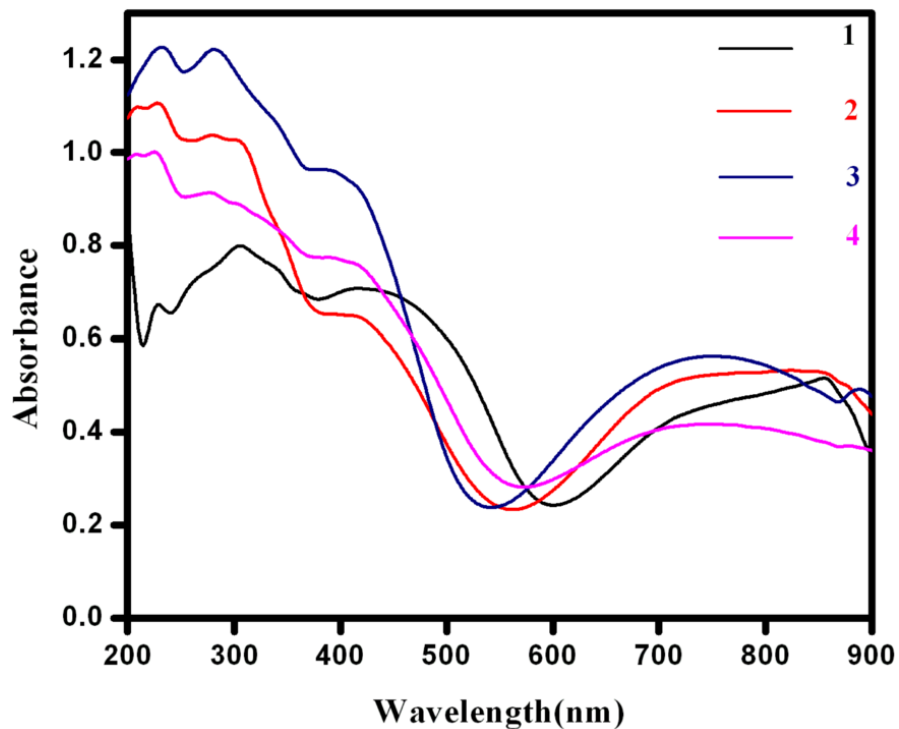

**Fig. S16** Electronic spectra of complex 1-4 in the solid-state at 25°C.

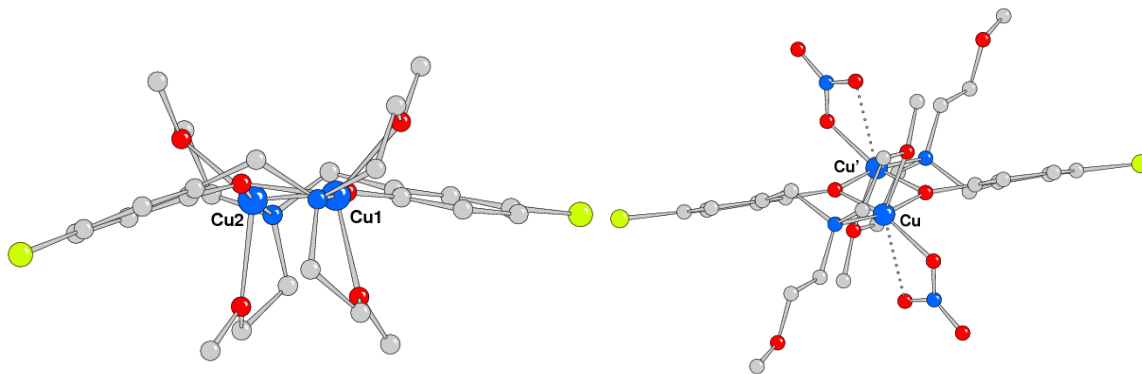

**Fig. S17** Side view of complexes 3 and 4 showing the different orientation of the phenolato moieties. Complex 4 shows a comparable arrangement of 3, substituting the nitrates with acetate anions.

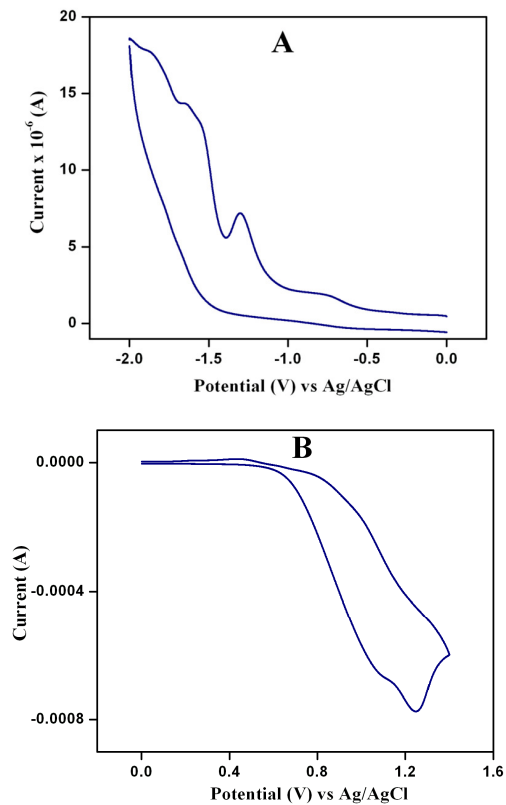

**Fig. S18** Cyclic voltammograms of ligand **HL1** in acetonitrile representing (A) reductive wave and (B) oxidative wave.

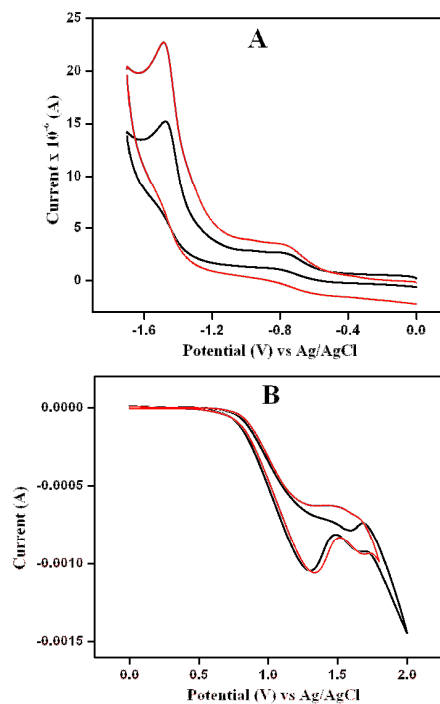

**Fig. S19** Cyclic voltammograms of ligand **HL2** in acetonitrile representing (A) reductive wave and (B) oxidative wave.

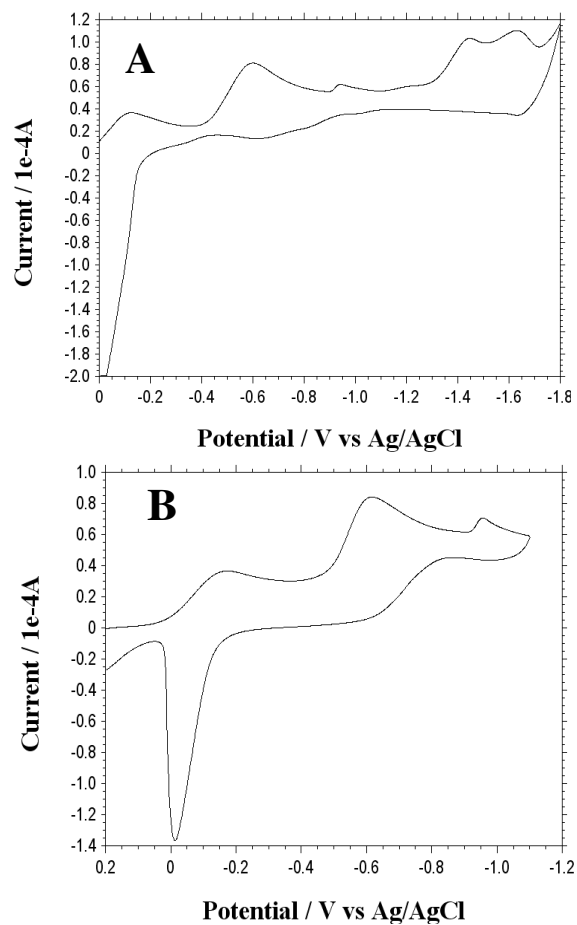

**Fig. S20** Cyclic voltammogram of complex **1** ( $10^{-3}$  M) in acetonitrile.

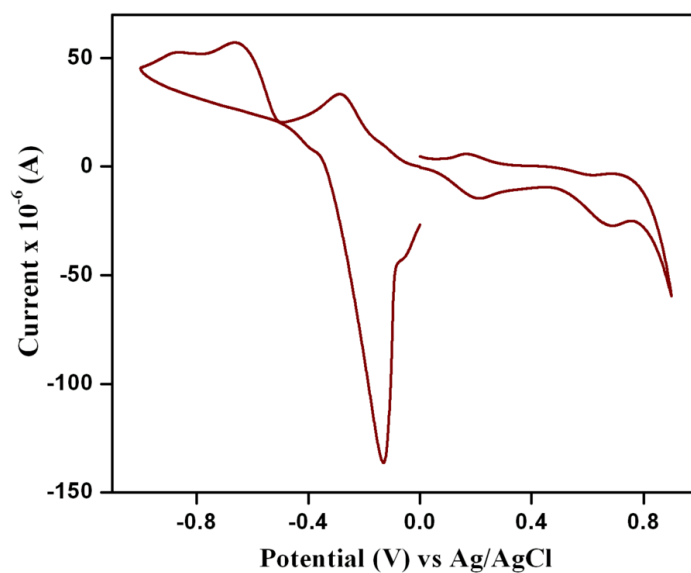

**Fig. S21** Cyclic voltammogram of a mixture of complex **1** and 3,5-DTBC (1:100) in acetonitrile.

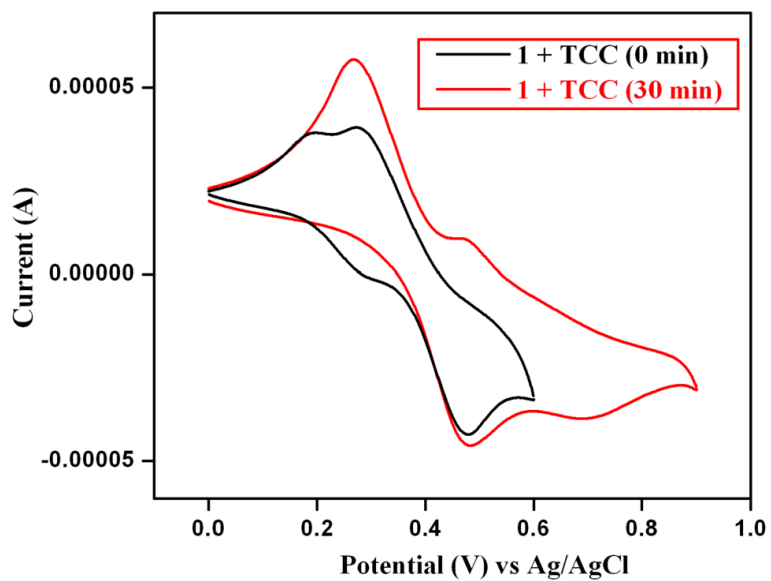

**Fig. S22** Cyclic voltammogram of a mixture of complex **1** and TCC (1:100) in acetonitrile.

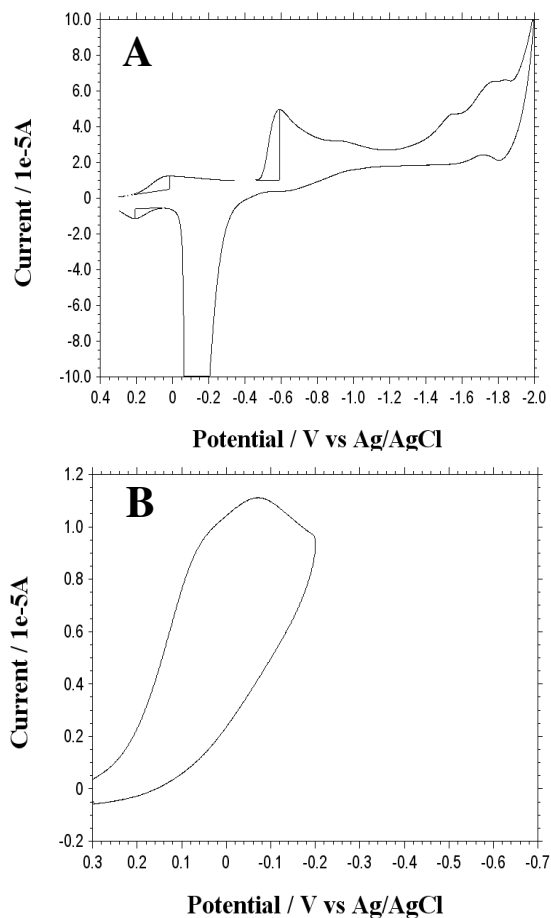

**Fig. S23** Cyclic voltammogram of complex **2** ( $10^{-3}$  M) in acetonitrile.

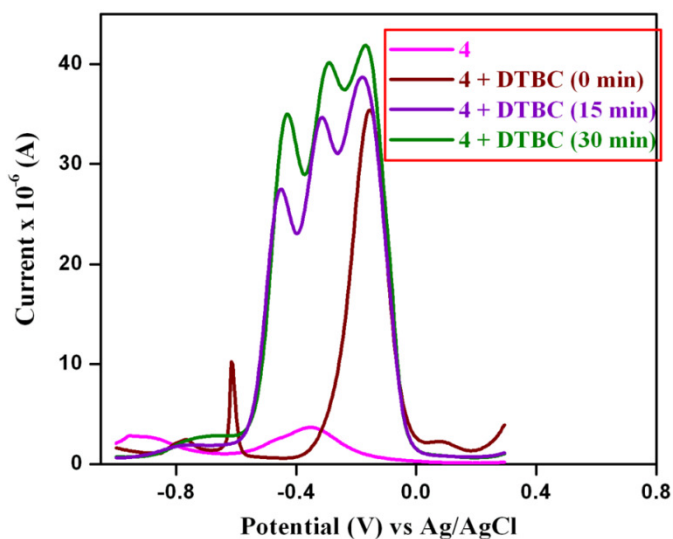

**Fig. S24** Differential pulse voltammogram of complex **4** in absence and presence of 3,5-DTBC in acetonitrile.

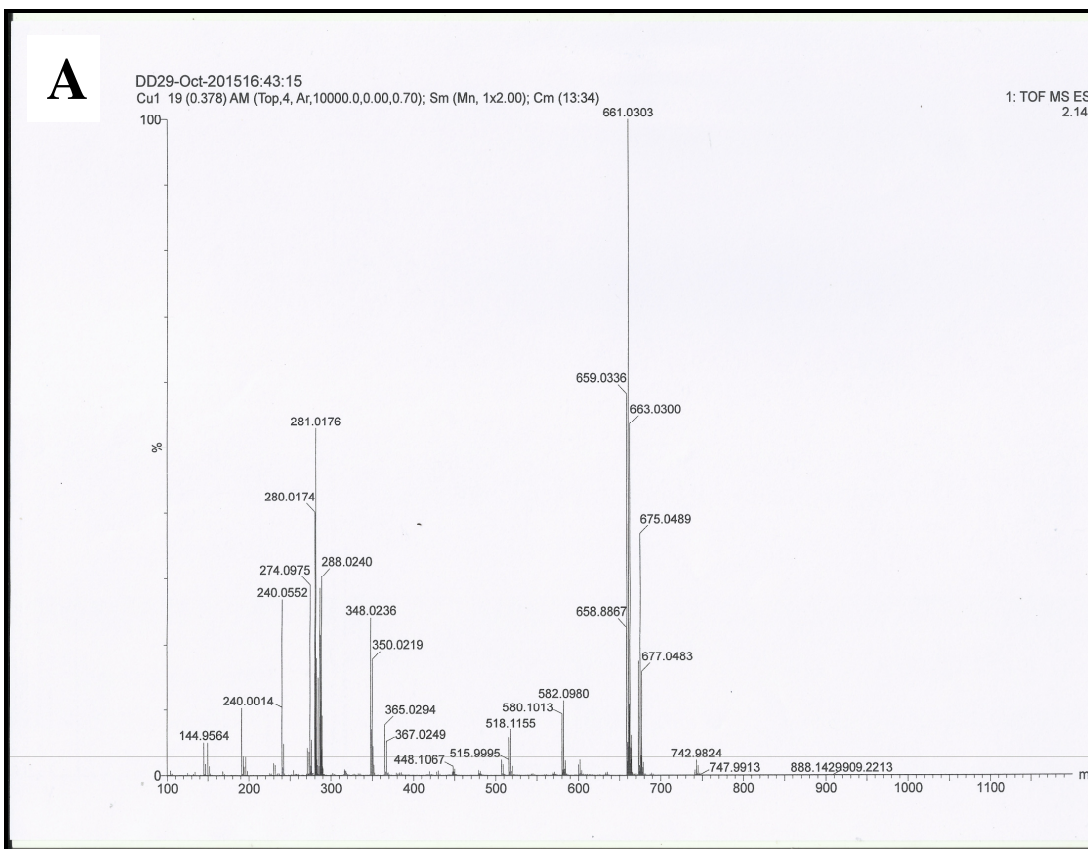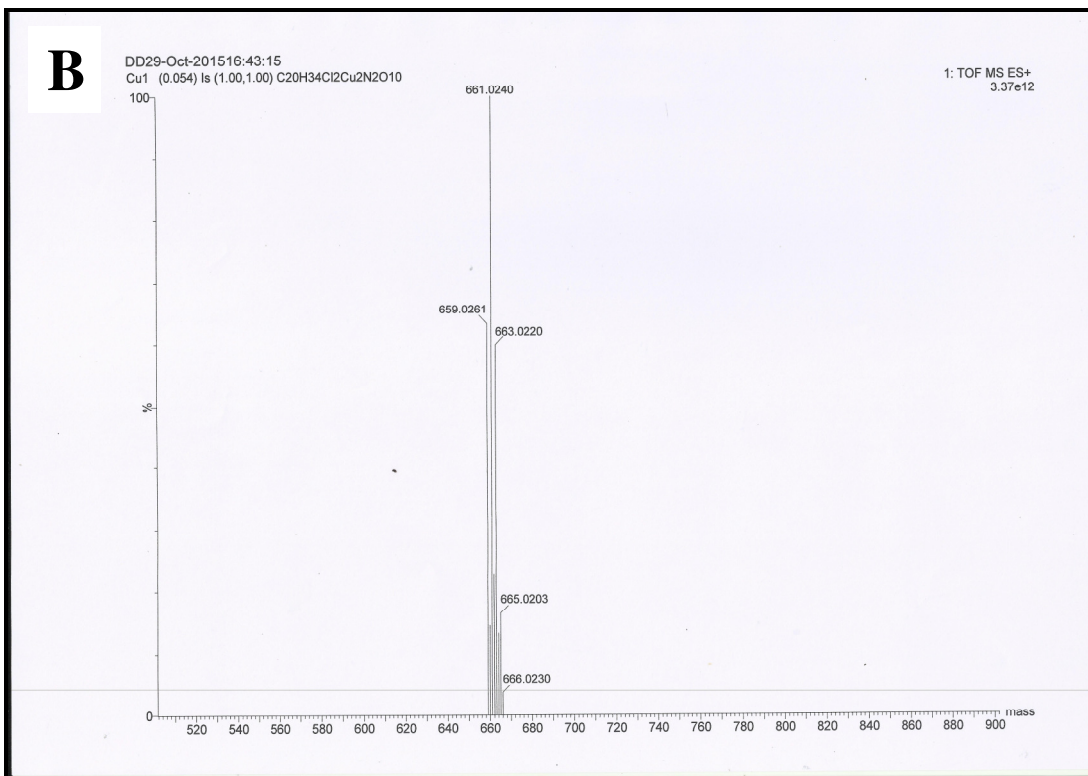



**Fig. S25** ESI-MS spectrum of complex **1** in acetonitrile (**A**) experimental (**B**) simulated.

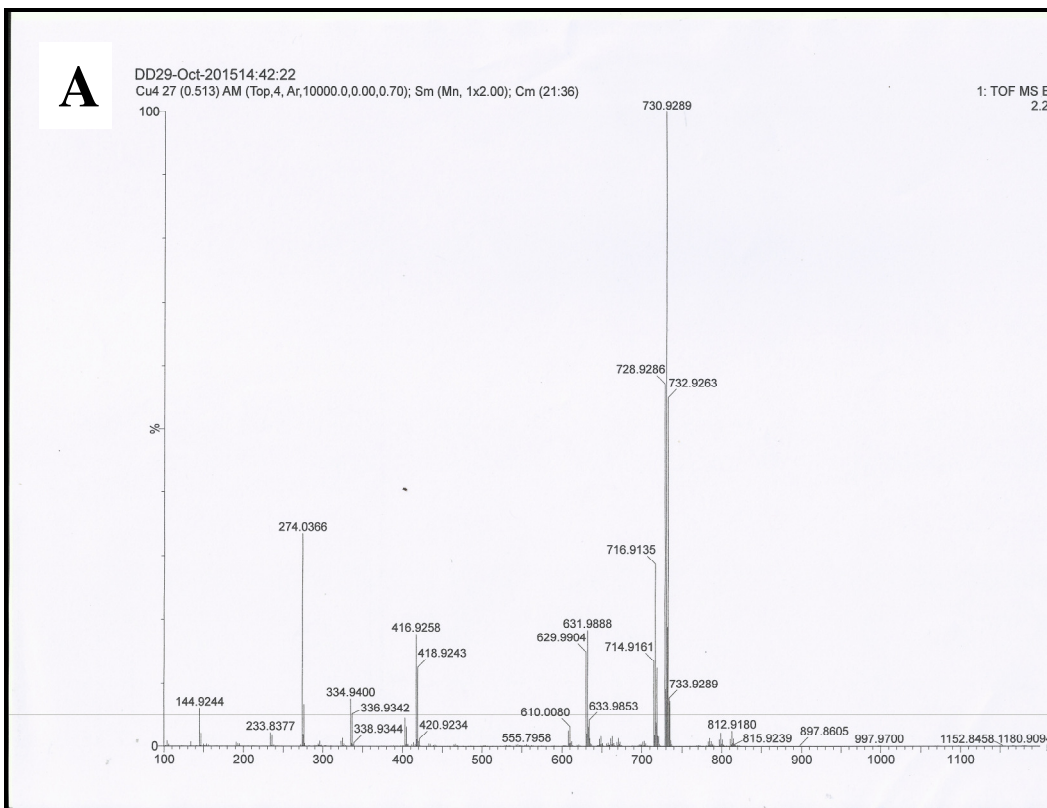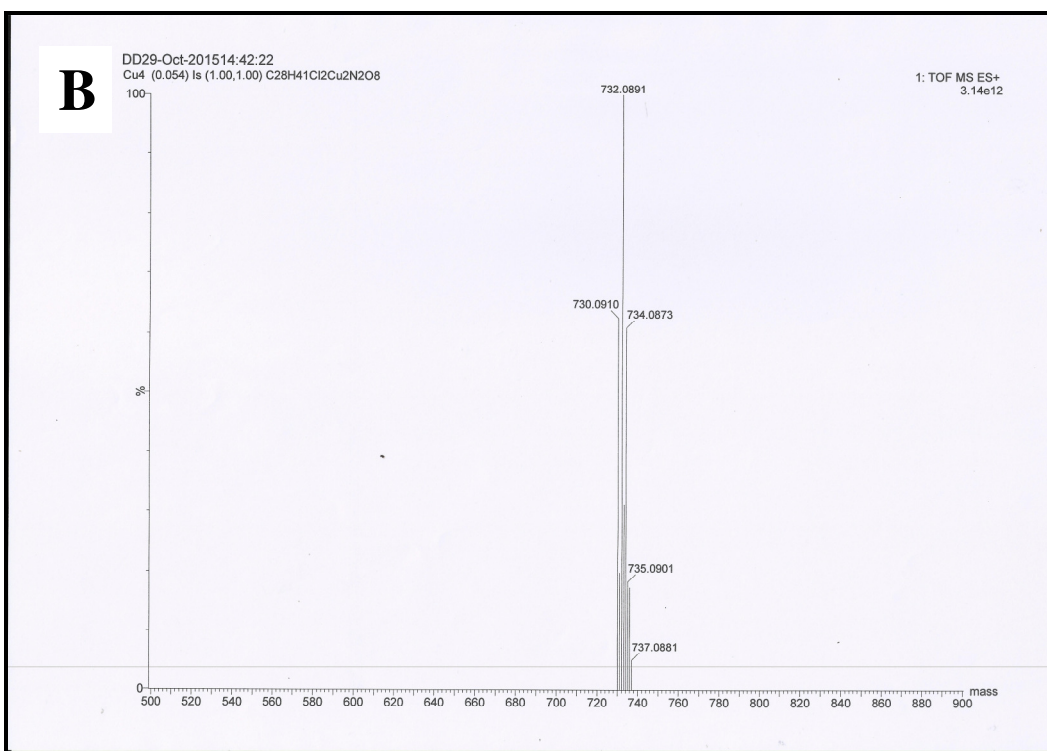

**Fig. S26** ESI-MS spectrum of complex **4** in acetonitrile (A) experimental (B) simulated.

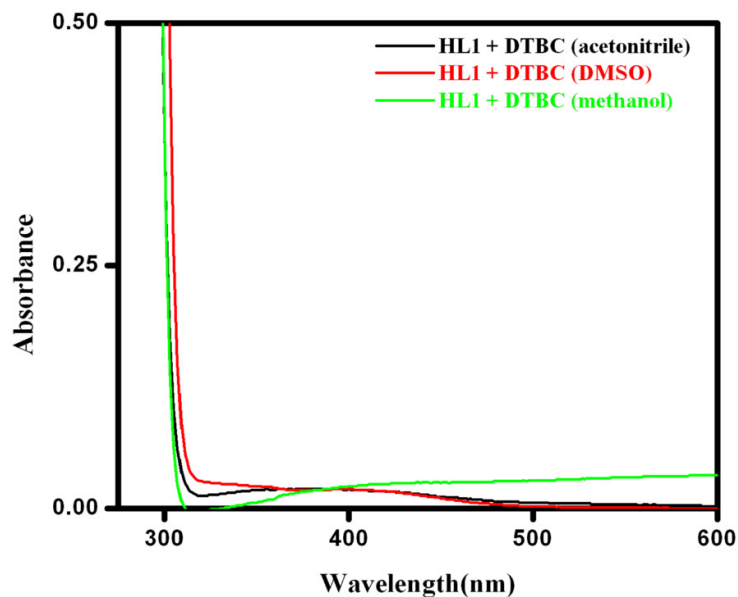

**Fig. S27** Control experiment for catecholase activity with 3,5-DTBC and ligand HL1 in three solvents. Conditions: [3,5-DTBC]= $10^{-2}$  (M); [HL1]= $10^{-4}$  (M); Temperature=298 K; Total time after mixing= 1 hour.

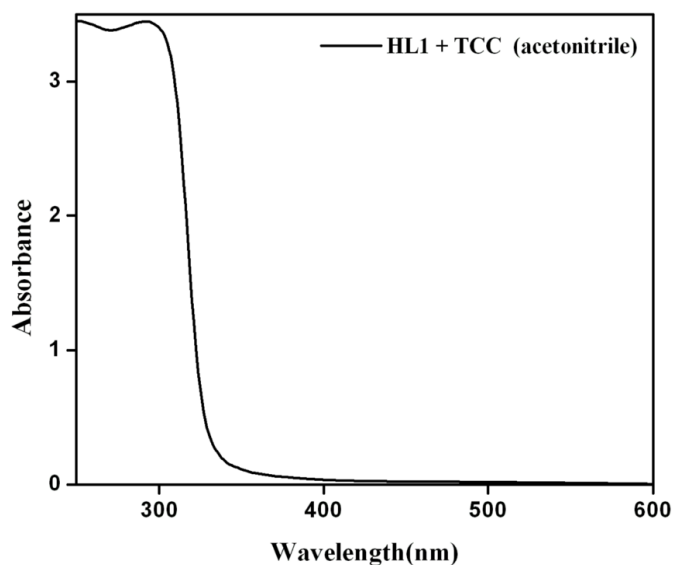

**Fig. S28** Control experiment for catecholase activity with TCC and ligand HL1 in acetonitrile. Conditions: [TCC]= $10^{-2}$  (M); [HL1]= $10^{-4}$  (M); Temperature=298 K; Total time after mixing= 1 hour.

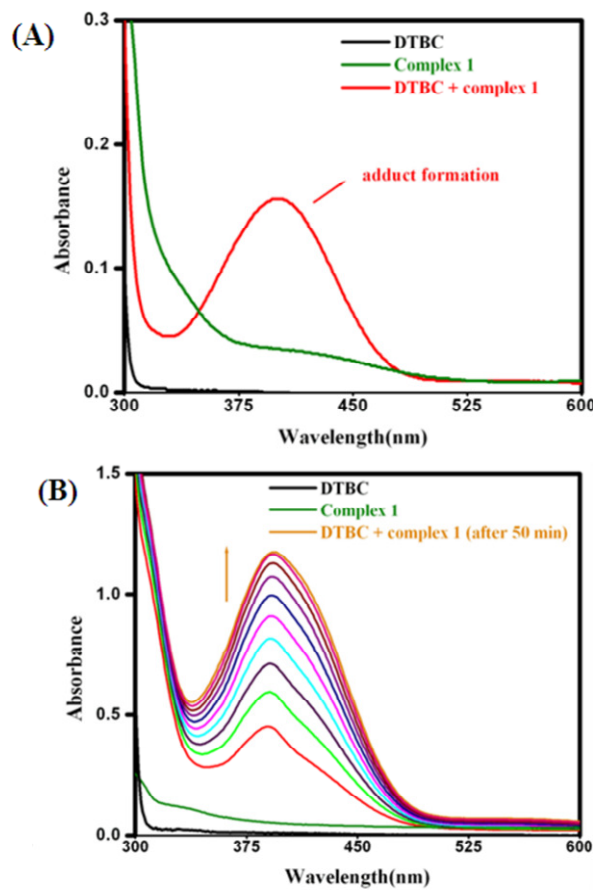

**Fig. S29** UV-vis scan of a mixture of 3,5-DTBC and complex **1** (molar stoichiometry=100:1) in (A) acetonitrile and (B) methanol recorded for 50 min at an interval of 5 min.

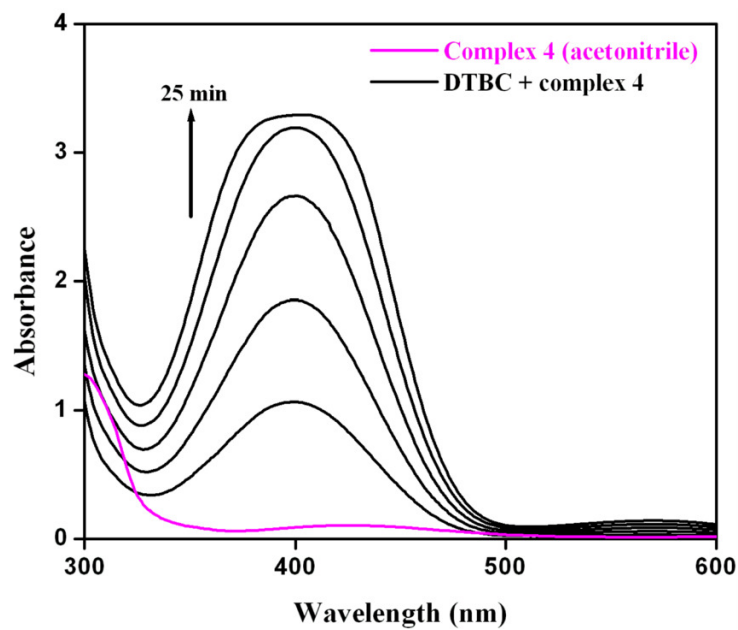

**Fig. S30** Wavelength scan of a mixture of complex **4** and 3,5-DTBC in 1:100 molar ratio in acetonitrile for 1 hour at an interval of 5 minutes. Conditions: [Complex **4**]= $10^{-4}$  (M); [3,5-DTBC]= $10^{-2}$  (M); Temperature=298K.

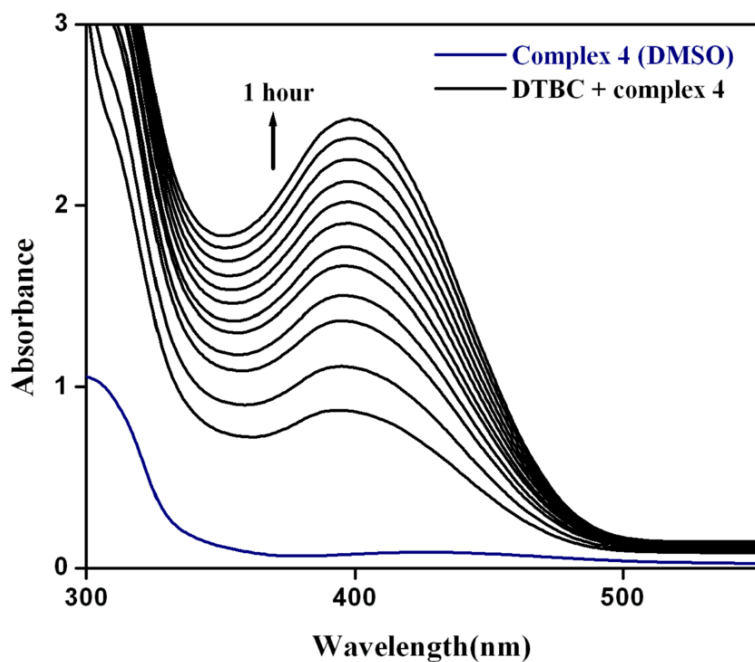

**Fig. S31** Wavelength scan of a mixture of complex **4** and 3,5-DTBC in 1:100 molar ratio in DMSO for 1 hour at an interval of 5 minutes. Conditions: [Complex **4**]= $10^{-4}$  (M); [3,5-DTBC]= $10^{-2}$  (M); Temperature=298K.

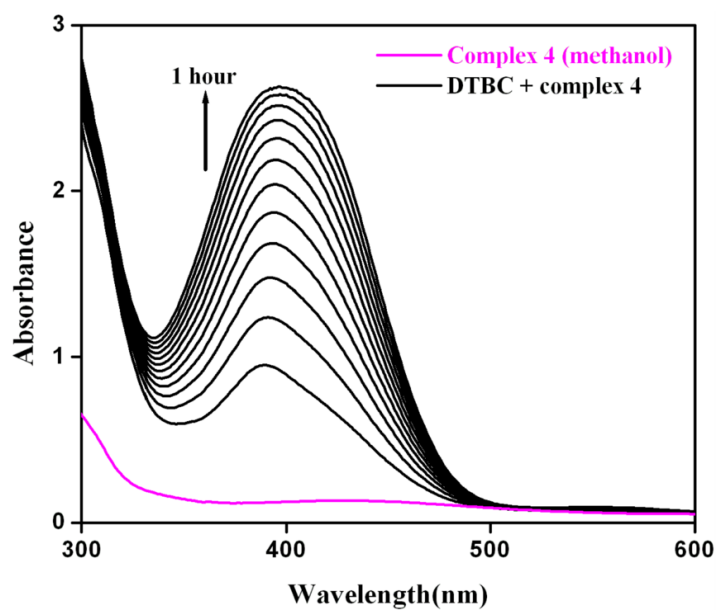

**Fig. S32** Wavelength scan of a mixture of complex **4** and 3,5-DTBC in 1:100 molar ratio in methanol for 1 hour at an interval of 5 minutes. Conditions: [Complex **4**]= $10^{-4}$  (M); [3,5-DTBC]= $10^{-2}$  (M); Temperature=298K.

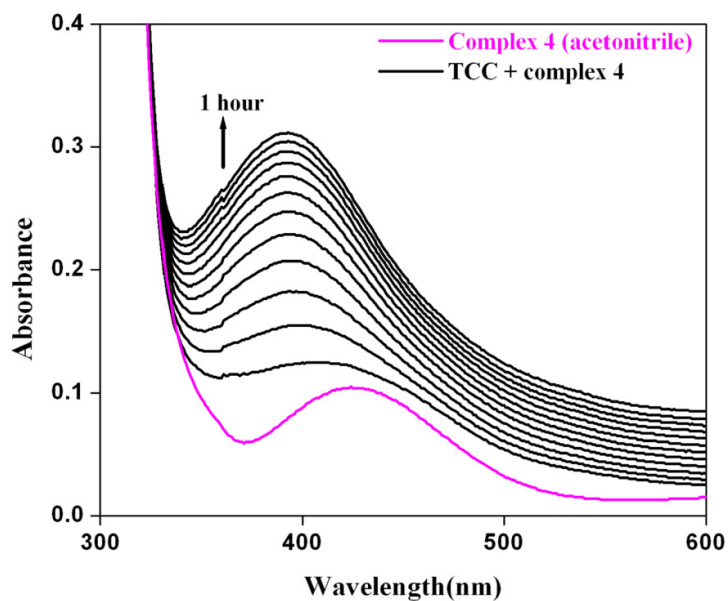

**Fig. S33** Wavelength scan of a mixture of complex **4** and TCC in 1:100 molar ratio in acetonitrile for 1 hour at an interval of 5 minutes. Conditions: [Complex **4**]= $10^{-4}$  (M); [TCC]= $10^{-2}$  (M); Temperature=298K.

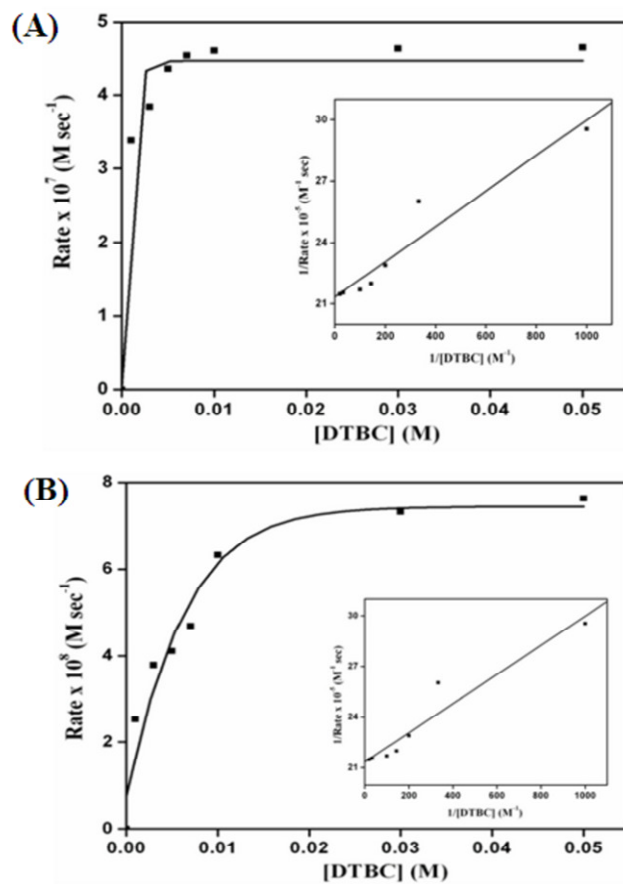

**Fig. S34** Kinetic plot of rate vs [3,5-DTBC] (V vs S) for the catecholase activity of complex **1** in (A) methanol ( $R^2 = 0.963$ , Intercept=21.33417 and Error=0.4433, Slope=0.00865 and Error=0.00108) and (B) DMSO ( $R^2 = 0.954$ , Intercept=152.63328 and Error=15.01562, Slope=0.25931 and Error=0.03653) at 298 K. Inset shows the double-reciprocal plot (1/V vs 1/S) for the same.

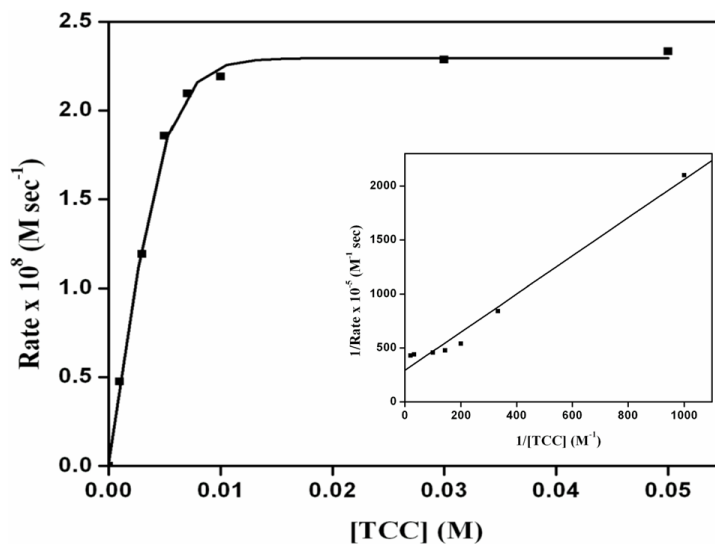

**Fig. S35** Kinetic plot of rate vs [TCC] (V vs S) for the catecholase activity of complex **1** in acetonitrile at 298 K. Inset shows the double-reciprocal plot (1/V vs 1/S) for the same having  $R^2 = 0.992$  (Intercept=292.35692 and Error=42.2376, Slope=1.76649 and Error=0.10274).

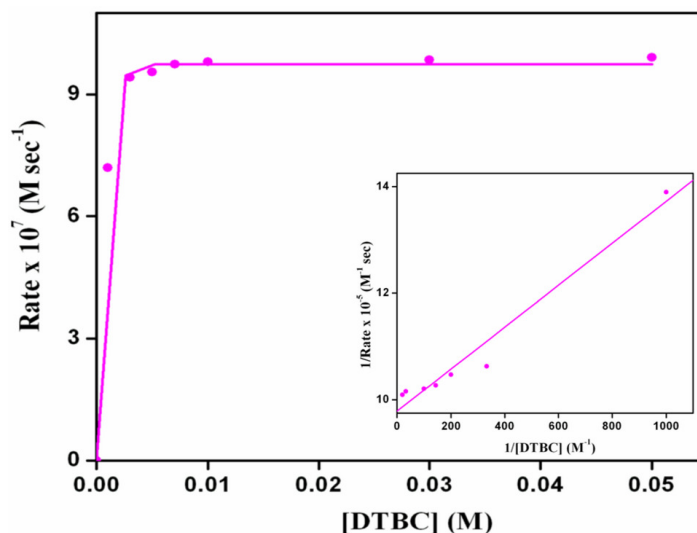

**Fig. S36** Kinetic plot of rate vs [3,5-DTBC] (V vs S) for the catecholase activity of complex **4** in acetonitrile at 298 K. Inset shows the double-reciprocal plot (1/V vs 1/S) for the same having  $R^2=0.983$  (Intercept=9.7875 and Error=0.1347, Slope=0.0039 and Error= $3.279 \times 10^{-4}$ ).

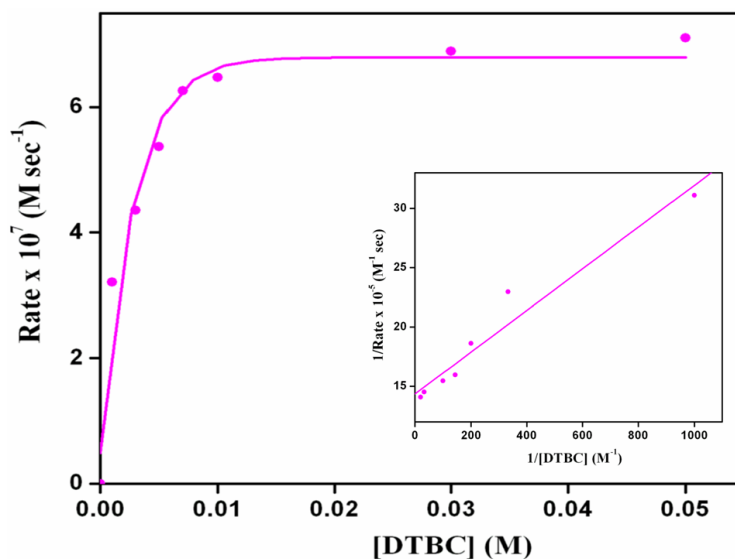

**Fig. S37** Kinetic plot of rate vs [3,5-DTBC] (V vs S) for the catecholase activity of complex **4** in DMSO at 298 K. Inset shows the double-reciprocal plot (1/V vs 1/S) for the same having  $R^2=0.983$  (Intercept=14.358 and Error=0.712, Slope=0.0176 and Error=0.0017).

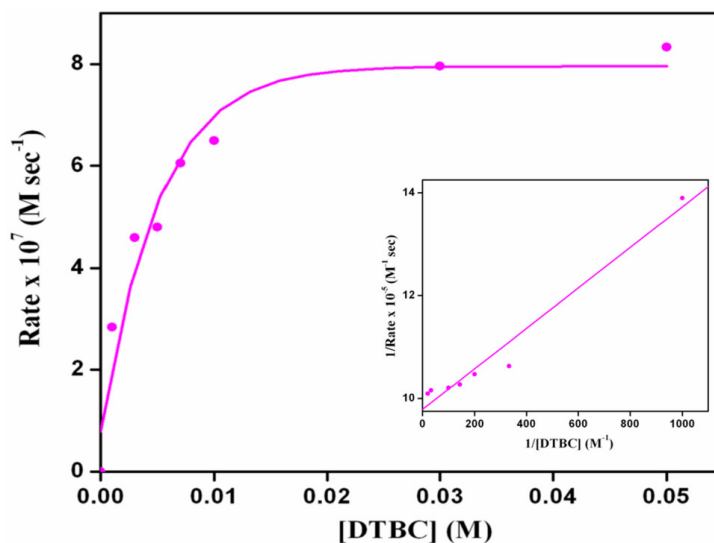

**Fig. S38** Kinetic plot of rate vs [3,5-DTBC] (V vs S) for the catecholase activity of complex **4** in methanol at 298 K. Inset shows the double-reciprocal plot (1/V vs 1/S) for the same having  $R^2=0.983$  (Intercept=9.7875 and Error=0.1348, Slope=0.0039 and Error=3.279×10<sup>-4</sup>).



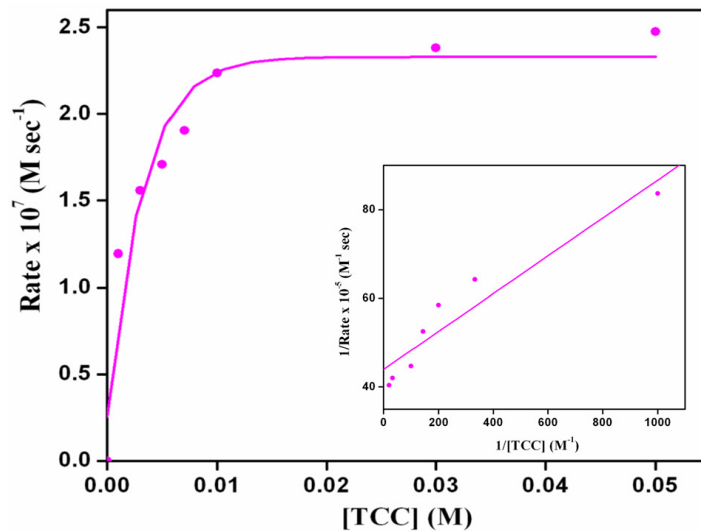

**Fig. S39** Kinetic plot of rate vs [TCC] (V vs S) for the catecholase activity of complex **4** in acetonitrile at 298 K. Inset shows the double-reciprocal plot (1/V vs 1/S) for the same having  $R^2=0.953$  (Intercept=43.983 and Error=2.505, Slope=0.043 and Error=0.006).

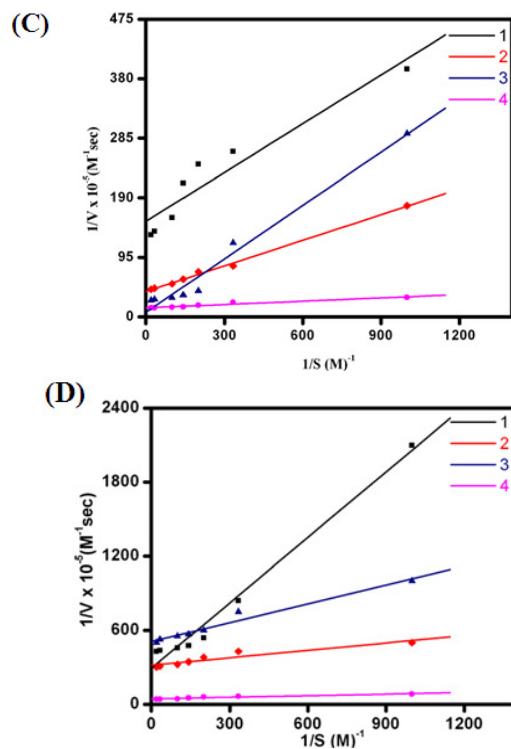

**Fig. S40** Overlay of Line-weaver Burk plots for complexes **1-4** with 3,5-DTBC in DMSO (C) and with TCC in acetonitrile (D).

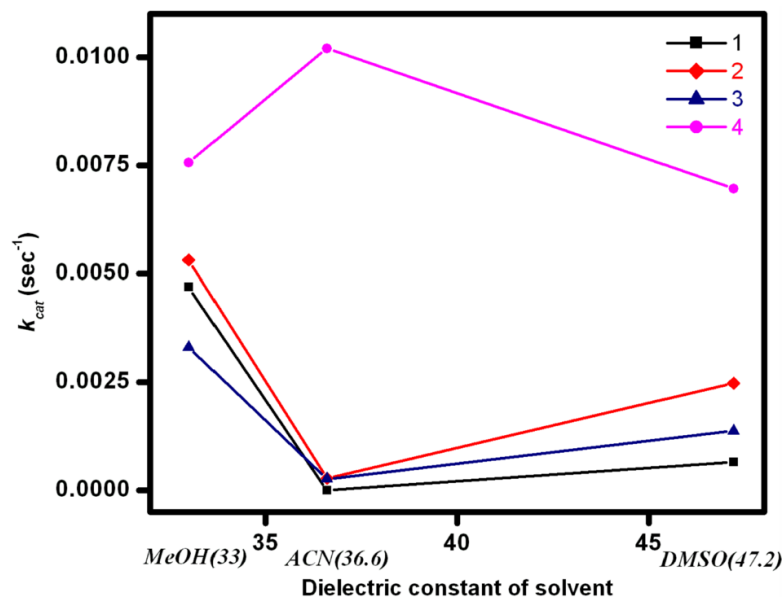

**Fig. S41** Variation of  $k_{cat}$  values of complex 1-4 with dielectric constant of the solvents.

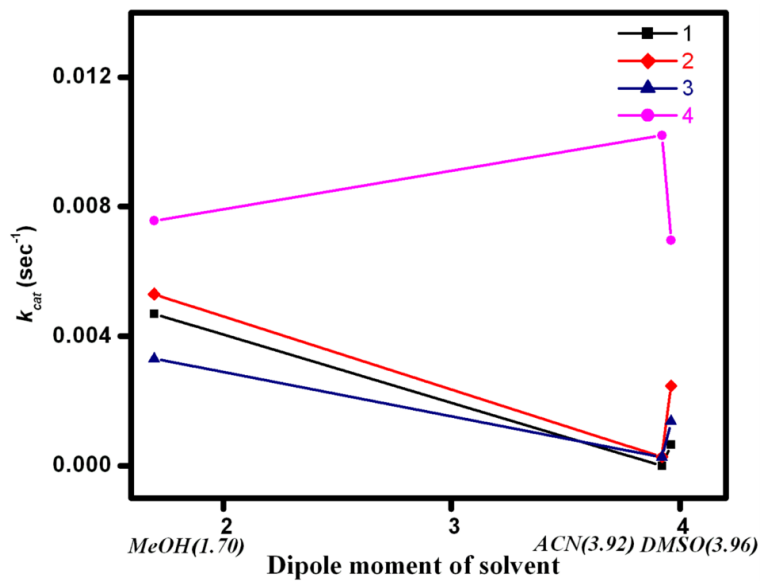

**Fig. S42** Variation of  $k_{cat}$  values of complex 1-4 with dipole moment of the solvents.

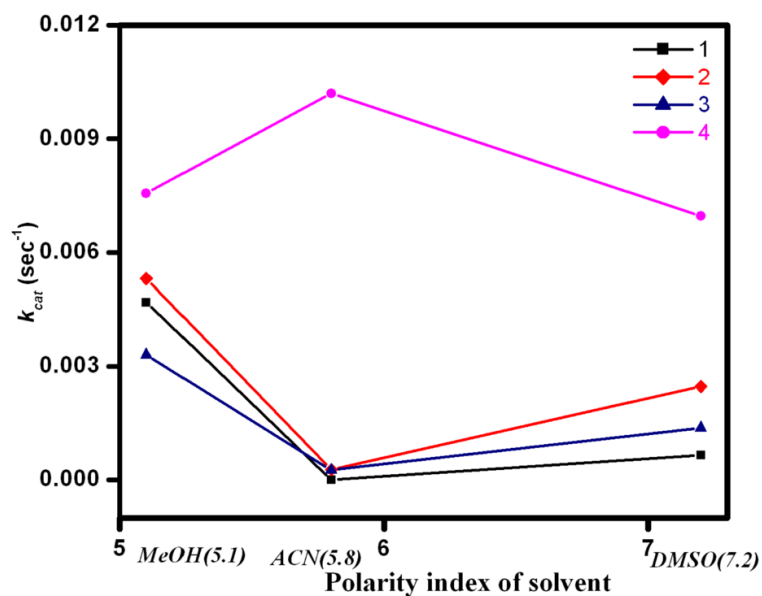

**Fig. S43** Variation of  $k_{cat}$  values of complex 1 - 4 with polarity index of the solvents.

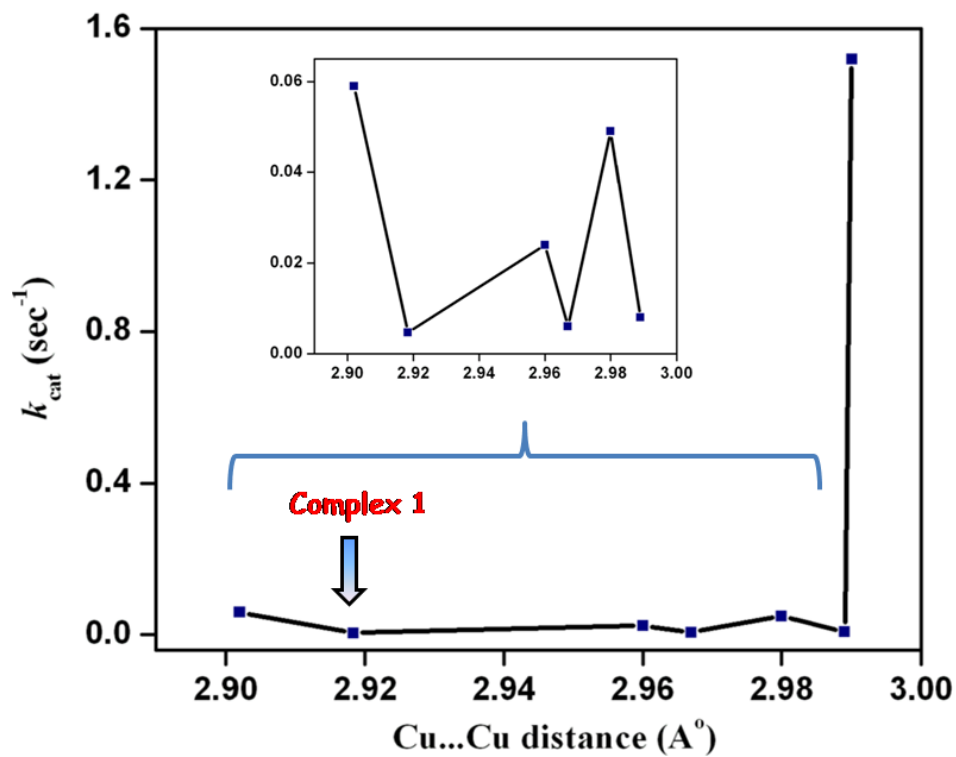

**Fig. S44** Interdependence of intermetallic distance and catecholase activity in dinuclear  $Cu^{II}$  complex having both phenoxido and hydroxo bridge.

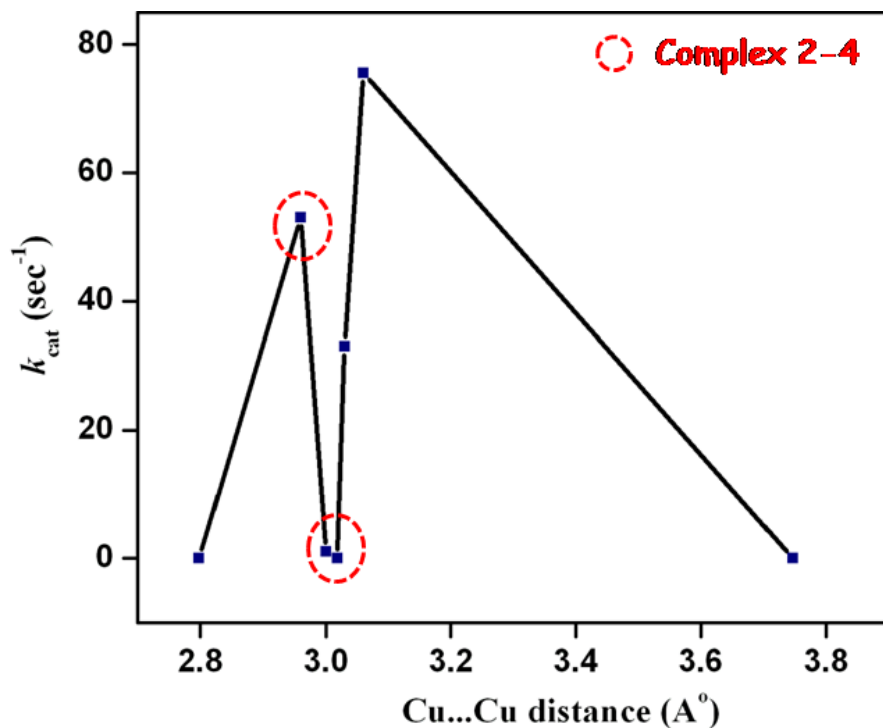

**Fig. S45** Interdependence of intermetallic distance and catecholase activity in dinuclear  $\text{Cu}^{\text{II}}$  complex having only phenoxido bridge.

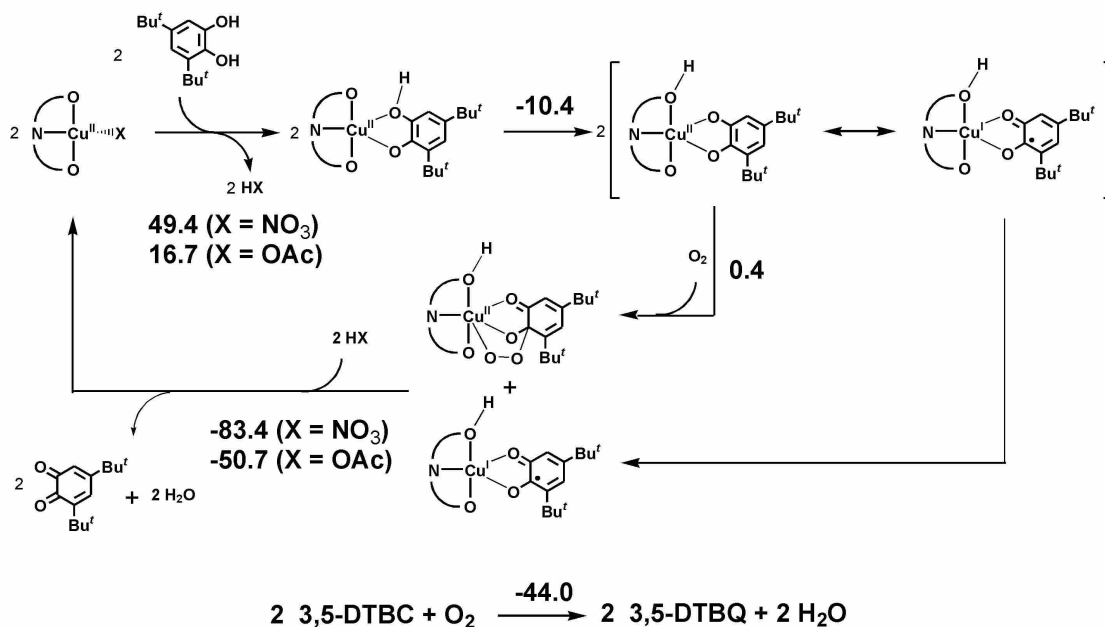

**Fig. S46.** B3LYP/DGDZVP energy changes ( $\text{kcal mol}^{-1}$ ) in the catalytic cycle based on the monomeric neutral species derived from complexes **3** and **4** in MeCN solution.

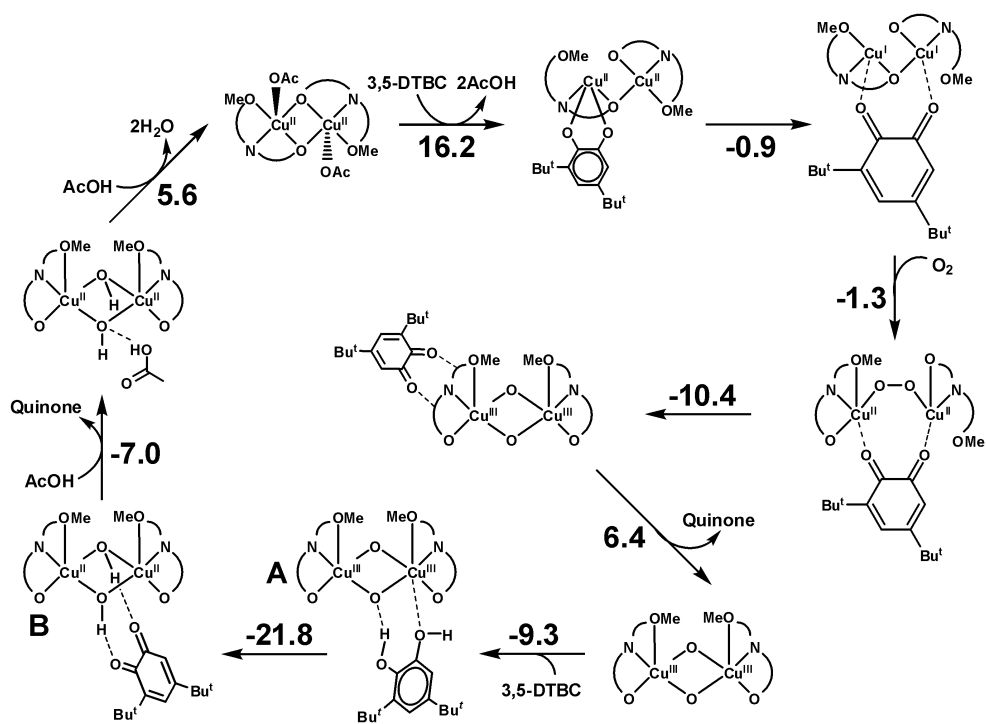

**Fig. S47.** PBE/TZ2P energy changes ( $\text{kcal mol}^{-1}$ ) in the catalytic cycle based on complex 4 without coordination of AcOH on the complexes.

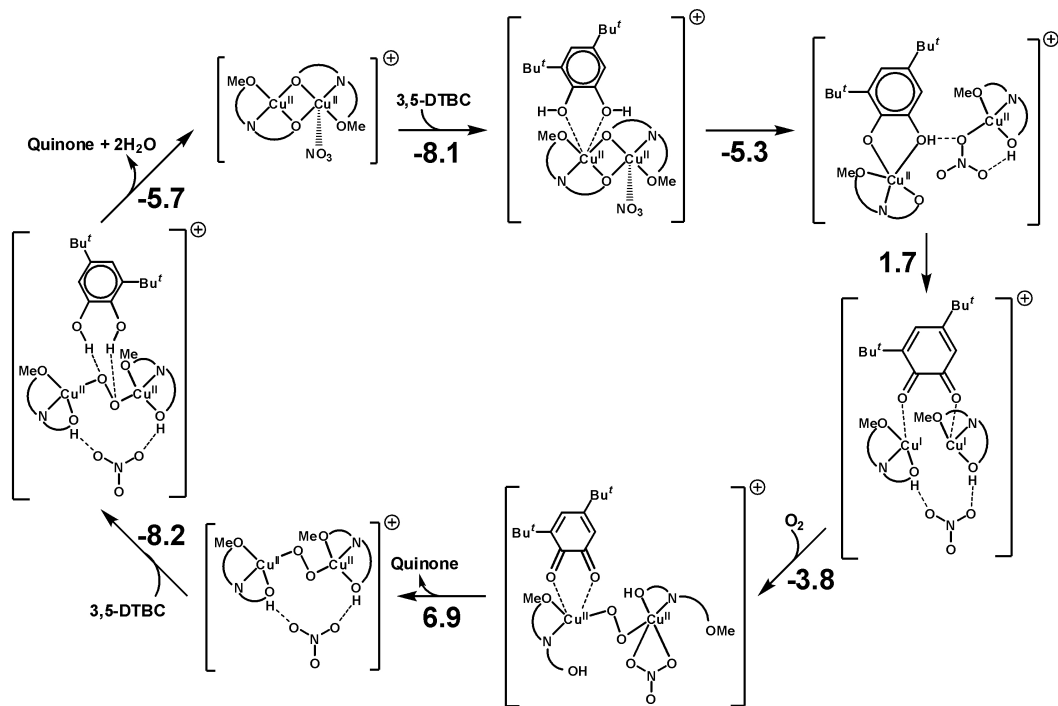

**Fig. S48.** Oxidation of 3,5-DTBC catalyzed by  $[\text{Cu}_2(\text{L2})_2(\text{NO}_3)]^+$ . The energy changes (kcal/mol) estimated at the PBE/TZ2P level of theory for each step are given.

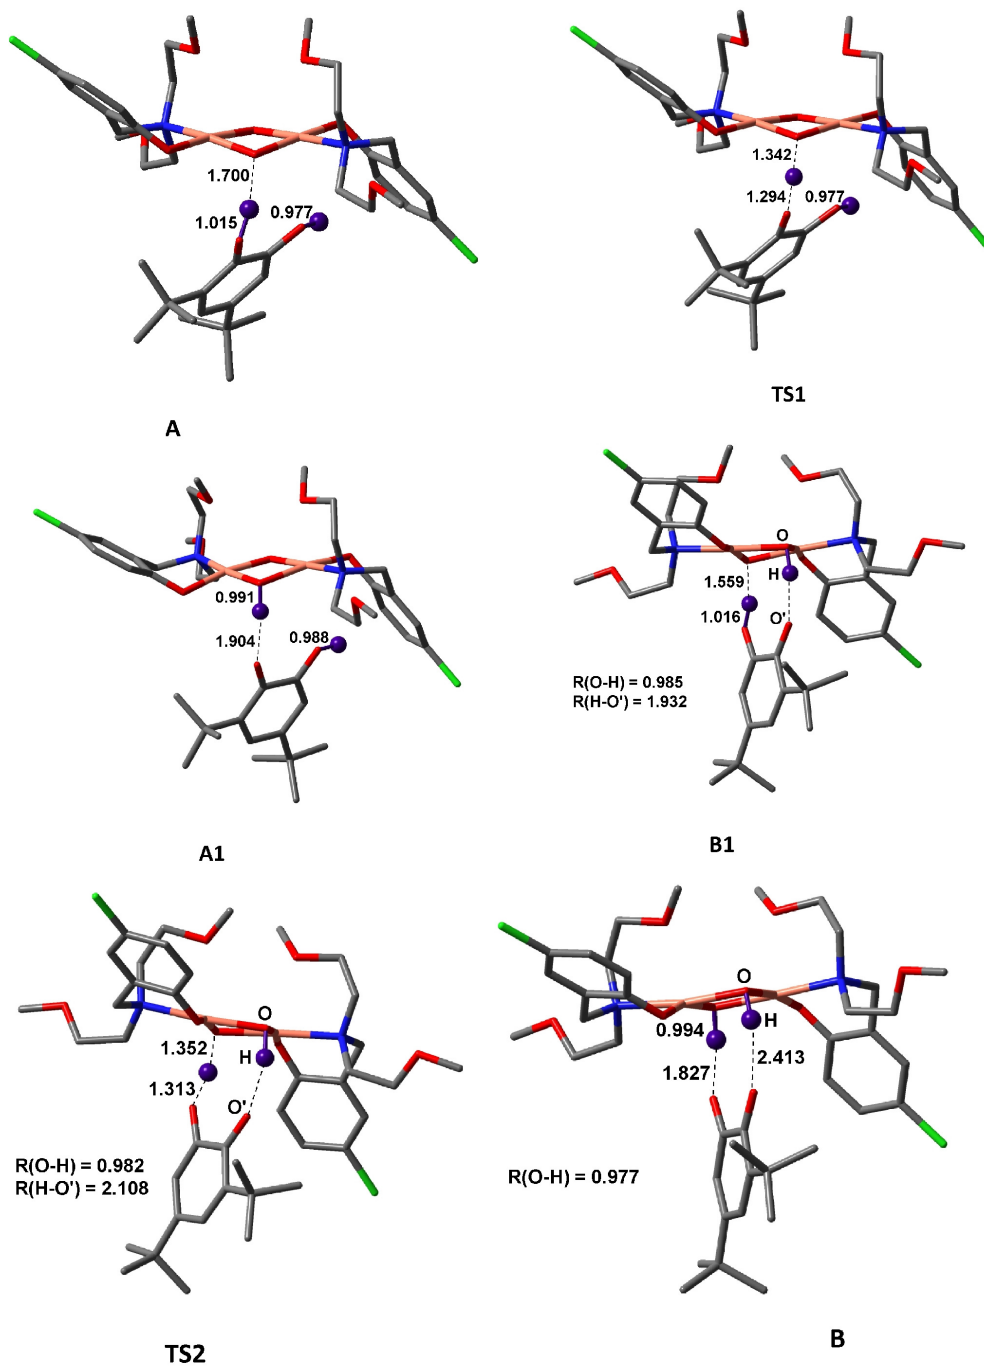

**Fig. S49.** Optimized (PBE/TZ2P) structures of the intermediates and transition states corresponding to the A→B reaction (Fig. 14). The O-H distances (Å) are given.

**Table S1** Theoretical and experimental weight loss (from thermograms) of the complexes (End product = CuO).

| Complex | Final temperature | % weight loss |              |
|---------|-------------------|---------------|--------------|
|         |                   | Theoretical   | Experimental |
| 3       | 664°C             | 90.02         | 91.36        |
| 4       | 678°C             | 90.17         | 85.97        |

**Table S2** Molar conductance values ( $\text{Scm}^2\text{mol}^{-1}$ ) of copper complexes at 298 K.

| Complex | DMSO  |        | Acetonitrile |        | Methanol |        |
|---------|-------|--------|--------------|--------|----------|--------|
|         | Value | Nature | Value        | Nature | Value    | Nature |
| 1       | 75    | 1:1    | 166          | 1:1    | 143      | 1:1    |
| 2       | 70    | 1:1    | 160          | 1:1    | 145      | 1:1    |
| 3       | 60    | 1:1    | 69           | 1:1    | 128      | 1:1    |
| 4       | 45    | 1:1    | 50           | 1:1    | 33       | 1:1    |

**Table S3** Kinetic parameters for catecholase activity of complex **1-4** with 3,5-DTBC.

| Complex | Solvent      | $V_{max} \times 10^7$ ( $\text{s}^{-1}$ ) | Standard error $\times 10^7$ ( $\text{s}^{-1}$ ) | $k_M \times 10^7$ (M) | Standard error $\times 10^9$ (M) | $k_{assoc} \times 10^{-7}$ ( $\text{M}^{-1}$ ) | $k_{cat}/k_M \times 10^{-4}$ ( $\text{M}^{-1}\text{s}^{-1}$ ) |
|---------|--------------|-------------------------------------------|--------------------------------------------------|-----------------------|----------------------------------|------------------------------------------------|---------------------------------------------------------------|
| 1       | Acetonitrile | -                                         | -                                                | -                     | -                                | -                                              | -                                                             |
|         | DMSO         | 0.65                                      | 0.065                                            | 0.17                  | 4.06                             | 5.88                                           | 3.86                                                          |

|          |              |       |      |      |       |       |        |
|----------|--------------|-------|------|------|-------|-------|--------|
|          | Methanol     | 4.69  | 0.1  | 405  | 0.59  | 2.47  | 0.01   |
| <b>2</b> | Acetonitrile | 0.27  | 0.01 | 0.14 | 1.88  | 7.14  | 1.95   |
|          | DMSO         | 2.47  | 0.07 | 0.34 | 1.94  | 2.94  | 7.35   |
|          | Methanol     | 5.31  | 0.30 | 0.18 | 2.00  | 5.55  | 29.17  |
| <b>3</b> | Acetonitrile | 0.26  | 0.09 | 1.13 | 48.6  | 0.88  | 0.23   |
|          | DMSO         | 1.37  | 0.85 | 0.39 | 0.26  | 2.56  | 3.52   |
|          | Methanol     | 3.41  | 0.10 | 0.21 | 1.35  | 4.76  | 16.55  |
| <b>4</b> | Acetonitrile | 10.20 | 0.11 | 0.04 | 0.38  | 25.00 | 250.00 |
|          | DMSO         | 6.96  | 0.38 | 0.12 | 1.89  | 8.33  | 57.00  |
|          | Methanol     | 7.56  | 0.22 | 0.17 | 23.03 | 5.88  | 43.9   |

**Table S4** Kinetic parameters for catecholase activity of complex **1-4** with TCC in acetonitrile.

| Complex  | $V_{max} \times 10^7$<br>( $s^{-1}$ ) | Standard<br>error $\times$<br>$10^8$ | $k_M \times 10^7$<br>(M) | Standard<br>error $\times$<br>$10^8$ | $k_{assoc} \times$<br>$10^{-7}$<br>( $M^{-1}$ ) | $k_{cat}/k_M \times$<br>$10^{-4}$<br>( $M^{-1}s^{-1}$ ) |
|----------|---------------------------------------|--------------------------------------|--------------------------|--------------------------------------|-------------------------------------------------|---------------------------------------------------------|
| <b>1</b> | 0.34                                  | 0.50                                 | 0.604                    | 1.25                                 | 1.66                                            | 0.57                                                    |
| <b>2</b> | 0.31                                  | 0.13                                 | 0.063                    | 0.76                                 | 15.87                                           | 5.00                                                    |
| <b>3</b> | 0.19                                  | 0.07                                 | 0.0998                   | 0.11                                 | 10.02                                           | 1.96                                                    |
| <b>4</b> | 2.27                                  | 1.24                                 | 0.097                    | 0.19                                 | 10.31                                           | 23.45                                                   |



**Table S5** First-Order Rate Constants for the oxidation of 3,5-DTBC by Previously Reported Dinuclear Cu<sup>II</sup> Complexes of Mannich-base and closely similar ligand systems<sup>a</sup>

| Complex                                                                                                                                                                                                                                                                                                                                                                             | Cu...Cu<br>(Å)               | Bridging                                        | Solvent                         | $k_{cat}$ (sec <sup>-1</sup> )   | Reference |
|-------------------------------------------------------------------------------------------------------------------------------------------------------------------------------------------------------------------------------------------------------------------------------------------------------------------------------------------------------------------------------------|------------------------------|-------------------------------------------------|---------------------------------|----------------------------------|-----------|
| [Cu <sub>2</sub> (L <sup>1</sup> -O)(μ-OH)][ClO <sub>4</sub> ] <sub>2</sub> ,<br>[Cu <sub>2</sub> (L <sup>3</sup> -O)(μ-C <sub>3</sub> H <sub>3</sub> N <sub>2</sub> )(OCIO <sub>3</sub> )(H <sub>2</sub> O)][ClO <sub>4</sub> ].H <sub>2</sub> O,<br>[Cu <sub>2</sub> (L <sup>4</sup> )(μ-OH) <sub>2</sub> ][ClO <sub>4</sub> ] <sub>2</sub> .H <sub>2</sub> O.                    | 2.99<br>3.37<br>-            | μ-OPh-μ-OH<br>μ-OR-μ-Pz<br>μ-OH                 | Acetonitrile                    | 1.52<br>0.029<br>0.028           | 14c       |
| [Cu <sub>2</sub> L <sub>2</sub> (H <sub>2</sub> O) <sub>x</sub> ].yH <sub>2</sub> O<br>(x,y=0-2)                                                                                                                                                                                                                                                                                    | ~3                           | μ-OPh                                           | Methanol                        | 0.055-1.055                      | 6b        |
| [Cu <sub>2</sub> L <sub>2</sub> (ClO <sub>4</sub> ) <sub>2</sub> ]<br>[Cu <sub>2</sub> L <sub>2</sub> (OH)]ClO <sub>4</sub>                                                                                                                                                                                                                                                         | 3.018<br>2.798               | μ-OPh                                           | Methanol                        | 0.026<br>0.065                   | 11a       |
| [Cu <sub>2</sub> (L <sup>1</sup> )(OH)(EtOH)(H <sub>2</sub> O)][ClO <sub>4</sub> ] <sub>2</sub> .H <sub>2</sub> O<br>[Cu <sub>2</sub> (L <sup>5</sup> )(OMe)][ClO <sub>4</sub> ] <sub>2</sub> .2MeOH<br>[Cu <sub>2</sub> (L <sup>6</sup> )(OMe)(MeOH)-<br>(ClO <sub>4</sub> )]ClO <sub>4</sub><br>[Cu <sub>2</sub> (L <sup>7</sup> )(OMe)(MeOH)(ClO <sub>4</sub> )]ClO <sub>4</sub> | 2.902<br>-<br>2.938<br>2.874 | μ-OH-μ-OPh<br>-<br>μ-HOMe-μ-OPh<br>μ-HOMe-μ-OPh | Methanol                        | 0.059<br>0.009<br>0.013<br>0.012 | 4b        |
| [Cu <sub>2</sub> (L <sup>1</sup> )(μ-OAc)](ClO <sub>4</sub> ) <sub>2</sub> ·(CH <sub>3</sub> ) <sub>2</sub> CHOH<br>[Cu <sub>2</sub> (L <sup>2</sup> )-<br>(μ-OAc)](ClO <sub>4</sub> )·H <sub>2</sub> O·(CH <sub>3</sub> ) <sub>2</sub> CHOH<br>[Cu <sub>2</sub> (L <sup>3</sup> )(μ-OAc)] <sup>2+</sup>                                                                            | 3.3975<br>3.4837<br>-        |                                                 | Methanol-water<br>(1:1); pH=8.5 | 0.025<br>0.051<br>0.0078         | 11c,24a   |
| [Cu <sub>2</sub> (EBA)(H <sub>2</sub> O) <sub>4</sub> ] <sup>4+</sup>                                                                                                                                                                                                                                                                                                               | 2.988                        | Double- μ-OH                                    | Methanol-                       | 0.05                             | 9         |

|                                                                                                                                                                                                                                                                                                   |                         |                     |                                                           |                            |     |
|---------------------------------------------------------------------------------------------------------------------------------------------------------------------------------------------------------------------------------------------------------------------------------------------------|-------------------------|---------------------|-----------------------------------------------------------|----------------------------|-----|
|                                                                                                                                                                                                                                                                                                   |                         |                     | water(30:1),pH=<br>5.1                                    |                            |     |
| [Cu <sub>2</sub> (LOCH <sub>3</sub> )(μ-OH)][(ClO <sub>4</sub> ) <sub>2</sub> ].C <sub>4</sub> H <sub>8</sub> O,<br>[Cu <sub>2</sub> (L <sub>F</sub> )(μ-OH)][(ClO <sub>4</sub> ) <sub>2</sub> ]                                                                                                  | 2.98<br>2.967           | μ-OH-μ-OPh          | Acetonitrile or<br>Acetonitrile-<br>water(20:80),pH<br>=7 | 0.049<br>0.006             | 11b |
| [Cu <sub>2</sub> (LB5)(H <sub>2</sub> O) <sub>2</sub> ][ClO <sub>4</sub> ] <sub>4</sub><br>[Cu <sub>2</sub> (L-55)] <sup>4+</sup>                                                                                                                                                                 | 8.019<br>-              | -                   | Methanol-<br>water(30:1),pH=<br>5.1                       | 0.035<br>0.33              | 10b |
| [Cu <sub>2</sub> (BPMP)(OH)][ClO <sub>4</sub> ] <sub>2</sub> 0.5C <sub>4</sub> H <sub>8</sub> O                                                                                                                                                                                                   | 2.96                    | μ-OH-μ-OPh          | Acetonitrile or<br>Acetonitrile-<br>water(20:80),pH<br>=7 | 0.024                      | 5b  |
| [Cu <sub>2</sub> (H <sub>2</sub> L)(μ-OH)][(ClO <sub>4</sub> ) <sub>2</sub> ],<br>[Cu <sub>2</sub> (L)(H <sub>2</sub> O) <sub>2</sub> PF <sub>6</sub>                                                                                                                                             | 2.9893<br>3.747         | μ-OH-μ-OPh<br>μ-OPh | Methanol-<br>water(30:1),pH=<br>8.5                       | 0.008<br>0.01              | 7a  |
| [Cu <sub>2</sub> (H <sub>2</sub> -bbppnol)(μ-<br>OAc)(H <sub>2</sub> O) <sub>2</sub> ]Cl <sub>2</sub> .2H <sub>2</sub> O<br>[Cu <sub>2</sub> (Hbtppnol)(μ-OAc)][(ClO <sub>4</sub> ) <sub>2</sub> ]<br>[Cu <sub>2</sub> (P1-O <sup>-</sup> )(OAc <sup>-</sup> )-(ClO <sub>4</sub> ) <sub>2</sub> ] | ~3.40                   | μ-OAc               | Methanol-<br>water(30:1),pH=<br>8                         | 0.0079<br>0.0078<br>0.0028 | 10c |
| [Cu <sub>2</sub> (L1)(μ-OAc) <sub>2</sub> ](BF <sub>4</sub> ).0.25Et <sub>2</sub> O<br>[Cu <sub>2</sub> (L2)(μ-OAc) <sub>2</sub> ](BF <sub>4</sub> )<br>[Cu <sub>2</sub> (L3)(μ-<br>OAc) <sub>2</sub> ](BF <sub>4</sub> ).0.25MeOH.0.75H <sub>2</sub> O                                           | 3.304<br>3.263<br>3.299 | μ-OAc-μ-OPh         | Methanol                                                  | 0.003<br>0.008<br>0.0001   | 16c |

<sup>a</sup>OPh=phenoxido, Pz=pyrazolate.

**Table S6.** Selected interatomic distances (Å) in the optimized **3** and **4** molecules (triplet states). The atom notations correspond to those in Figs. 6, 7.

| Atoms    | Complex <b>3</b> |              | Complex <b>4</b> |              |
|----------|------------------|--------------|------------------|--------------|
|          | PBE/TZ2P         | B3LYP/DGDZVP | PBE/TZ2P         | B3LYP/DGDZVP |
| Cu-O(1)  | 1.973            | 1.970        | 1.983            | 1.987        |
| Cu-O(1') | 2.067            | 2.044        | 2.058            | 2.037        |
| Cu-O(3)  | 2.467            | 2.458        | 2.468            | 2.453        |
| Cu-O(4)  | 1.983            | 1.993        | 1.970            | 1.964        |
| Cu-N(1)  | 2.127            | 2.125        | 2.123            | 2.124        |
| Cu-Cu'   | 3.085            | 3.071        | 3.094            | 3.091        |

**Table S7.** Energy changes in the reactions corresponding to oxidation of 3,5-DTBC catalyzed by  $[\text{Cu}_2(\text{L}2)_2(\text{AcO})_2]$  (Fig. 13).

| Reaction                                                                                                                                                                                                           | $\Delta E$ , kcal mol <sup>-1</sup> |
|--------------------------------------------------------------------------------------------------------------------------------------------------------------------------------------------------------------------|-------------------------------------|
| $[\text{Cu}^{\text{II}}_2(\text{L}2)_2(\text{OAc})_2] + \text{CatH}_2 \rightarrow [\text{Cu}^{\text{II}}_2(\text{L}2)_2(\text{Cat})] \cdot 2\text{AcOH}$                                                           | -0.4                                |
| $[\text{Cu}^{\text{II}}_2(\text{L}2)_2(\text{Cat})] \cdot 2\text{AcOH} \rightarrow [\text{Cu}^{\text{I}}_2(\text{L}2)_2(3,5\text{-DTBQ})] \cdot 2\text{AcOH}$                                                      | -0.9                                |
| $[\text{Cu}^{\text{I}}_2(\text{L}2)_2(3,5\text{-DTBQ})] \cdot 2\text{AcOH} + \text{O}_2 \rightarrow [\text{Cu}^{\text{II}}_2(\text{L}2)_2(3,5\text{-DTBQ})(\text{O}_2)] \cdot 2\text{AcOH}$                        | -1.3                                |
| $[\text{Cu}^{\text{II}}_2(\text{L}2)_2(3,5\text{-DTBQ})(\text{O}_2)] \cdot 2\text{AcOH} \rightarrow [\text{Cu}^{\text{III}}_2(\text{L}2)_2(\text{O}_2)] \cdot (3,5\text{-DTBQ}) \cdot \text{AcOH} + \text{AcOH}$   | -2.1                                |
| $[\text{Cu}^{\text{III}}_2(\text{L}2)_2(\text{O}_2)] \cdot (3,5\text{-DTBQ}) \cdot \text{AcOH} + \text{AcOH} \rightarrow [\text{Cu}^{\text{III}}_2(\text{L}2)_2(\text{O}_2)] \cdot 2\text{AcOH} + 3,5\text{-DTBQ}$ | -1.9                                |
| $[\text{Cu}^{\text{III}}_2(\text{L}2)_2(\text{O}_2)] \cdot 2\text{AcOH} + \text{CatH}_2 \rightarrow [\text{Cu}^{\text{III}}_2(\text{L}2)_2(\text{O}_2)(\text{CatH}_2)] \cdot \text{AcOH} + \text{AcOH}$            | -1.0                                |
| $[\text{Cu}^{\text{III}}_2(\text{L}2)_2(\text{O}_2)(\text{CatH}_2)] \cdot \text{AcOH} \rightarrow [\text{Cu}^{\text{II}}_2(\text{L}2)_2(\text{OH})_2(3,5\text{-DTBQ})] + \text{AcOH}$                              | -13.5                               |
| $[\text{Cu}^{\text{II}}_2(\text{L}2)_2(\text{OH})_2(3,5\text{-DTBQ})] + \text{AcOH} \rightarrow [\text{Cu}^{\text{II}}_2(\text{L}2)_2(\text{OH})_2(\text{AcOH})] + 3,5\text{DTBQ}$                                 | -7.0                                |
| $[\text{Cu}^{\text{II}}_2(\text{L}2)_2(\text{OH})_2(\text{AcOH})] + \text{AcOH} \rightarrow [\text{Cu}^{\text{II}}_2(\text{L}2)_2(\text{OAc})_2] + 2\text{H}_2\text{O}$                                            | 5.6                                 |

**Table S8.** Energy changes in the reactions corresponding to oxidation of 3,5-DTBC catalyzed by monomeric copper complexes (Fig S46).

| Reaction                                                                                                                                                                                                                             | $\Delta E$ , kcal mol <sup>-1</sup> |
|--------------------------------------------------------------------------------------------------------------------------------------------------------------------------------------------------------------------------------------|-------------------------------------|
| $2[\text{Cu}^{\text{II}}(\text{L2})(\text{NO}_3)] + 2\text{CatH}_2 \rightarrow 2[\text{Cu}^{\text{II}}(\text{L2})(\text{CatH})] + 2\text{HNO}_3$                                                                                     | 49.4                                |
| $2[\text{Cu}^{\text{II}}(\text{L2})(\text{OAc})] + 2\text{CatH}_2 \rightarrow 2[\text{Cu}^{\text{II}}(\text{L2})(\text{CatH})] + 2\text{AcOH}$                                                                                       | 16.7                                |
| $2[\text{Cu}^{\text{II}}(\text{L2})(\text{CatH})] \rightarrow 2\{[\text{Cu}^{\text{II}}(\text{HL2})(\text{Cat})] \leftrightarrow [\text{Cu}^{\text{I}}(\text{HL2})(\text{SQ})]\}$                                                    | -10.4                               |
| $\{[\text{Cu}^{\text{II}}(\text{HL2})(\text{Cat})] \leftrightarrow [\text{Cu}^{\text{I}}(\text{HL2})(\text{SQ})]\} + \text{O}_2 \rightarrow [\text{Cu}^{\text{II}}(\text{HL2})(\text{SQ})(\text{O}_2)]$                              | 0.4                                 |
| $[\text{Cu}^{\text{II}}(\text{HL2})(\text{SQ})(\text{O}_2)] + [\text{Cu}^{\text{I}}(\text{HL2})(\text{SQ})] + 2\text{HNO}_3 \rightarrow 2[\text{Cu}^{\text{II}}(\text{L2})(\text{NO}_3)] + 2(3,5\text{-DTBQ}) + 2\text{H}_2\text{O}$ | -83.4                               |
| $[\text{Cu}^{\text{II}}(\text{HL2})(\text{SQ})(\text{O}_2)] + [\text{Cu}^{\text{I}}(\text{HL2})(\text{SQ})] + 2\text{AcOH} \rightarrow 2[\text{Cu}^{\text{II}}(\text{L2})(\text{OAc})] + 2(3,5\text{-DTBQ}) + 2\text{H}_2\text{O}$   | -50.7                               |

**Table S9.** Energy changes in the reactions corresponding to the catalytic cycle based on complex **4** without coordination of AcOH on the complexes (Fig. S47).

| Reaction                                                                                                                                                                           | $\Delta E$ , kcal mol <sup>-1</sup> |
|------------------------------------------------------------------------------------------------------------------------------------------------------------------------------------|-------------------------------------|
| $[\text{Cu}^{\text{II}}_2(\text{L2})_2(\text{OAc})_2] + \text{CatH}_2 \rightarrow [\text{Cu}^{\text{II}}_2(\text{L2})_2(\text{Cat})] + 2\text{AcOH}$                               | 16.2                                |
| $[\text{Cu}^{\text{II}}_2(\text{L2})_2(\text{Cat})] \rightarrow [\text{Cu}^{\text{I}}_2(\text{L2})_2(3,5\text{-DTBQ})]$                                                            | -0.9                                |
| $[\text{Cu}^{\text{I}}_2(\text{L2})_2(3,5\text{-DTBQ})] + \text{O}_2 \rightarrow [\text{Cu}^{\text{II}}_2(\text{L2})_2(3,5\text{-DTBQ})(\text{O}_2)]$                              | -1.3                                |
| $[\text{Cu}^{\text{II}}_2(\text{L2})_2(3,5\text{-DTBQ})(\text{O}_2)] \rightarrow [\text{Cu}^{\text{III}}_2(\text{L2})_2(\text{O}_2)] \cdot (3,5\text{-DTBQ})$                      | -10.4                               |
| $[\text{Cu}^{\text{III}}_2(\text{L2})_2(\text{O}_2)] \cdot (3,5\text{-DTBQ}) \rightarrow [\text{Cu}^{\text{III}}_2(\text{L2})_2(\text{O}_2)] + 3,5\text{-DTBQ}$                    | 6.4                                 |
| $[\text{Cu}^{\text{III}}_2(\text{L2})_2(\text{O}_2)] + \text{CatH}_2 \rightarrow [\text{Cu}^{\text{III}}_2(\text{L2})_2(\text{O}_2)(\text{CatH}_2)]$                               | -9.3                                |
| $[\text{Cu}^{\text{III}}_2(\text{L2})_2(\text{O}_2)(\text{CatH}_2)] \rightarrow [\text{Cu}^{\text{II}}_2(\text{L2})_2(\text{OH})_2(3,5\text{-DTBQ})]$                              | -21.8                               |
| $[\text{Cu}^{\text{II}}_2(\text{L2})_2(\text{OH})_2(3,5\text{-DTBQ})] + \text{AcOH} \rightarrow [\text{Cu}^{\text{II}}_2(\text{L2})_2(\text{OH})_2(\text{AcOH})] + 3,5\text{DTBQ}$ | -7.0                                |
| $[\text{Cu}^{\text{II}}_2(\text{L2})_2(\text{OH})_2(\text{AcOH})] + \text{AcOH} \rightarrow [\text{Cu}^{\text{II}}_2(\text{L2})_2(\text{OAc})_2] + 2\text{H}_2\text{O}$            | 5.6                                 |

**Table S10.** Energy changes in the reactions corresponding to the oxidation of 3,5-DTBC catalyzed by  $[\text{Cu}_2(\text{L2})_2(\text{NO}_3)]^+$ . (Fig. S8).

| Reaction                                                                                                                                                                                      | $\Delta E$ , kcal mol <sup>-1</sup> |
|-----------------------------------------------------------------------------------------------------------------------------------------------------------------------------------------------|-------------------------------------|
| $[\text{Cu}^{\text{II}}_2(\text{L2})_2(\text{NO}_3)]^+ + \text{CatH}_2 \rightarrow [\text{Cu}^{\text{II}}_2(\text{L2})_2(\text{NO}_3)(\text{CatH}_2)]^+$                                      | -8.1                                |
| $[\text{Cu}^{\text{II}}_2(\text{L2})_2(\text{NO}_3)(\text{CatH}_2)]^+ \rightarrow [\text{Cu}^{\text{II}}_2(\text{L2})(\text{HL2})(\text{NO}_3)(\text{CatH})]^+$                               | -5.3                                |
| $[\text{Cu}^{\text{II}}_2(\text{L2})(\text{HL2})(\text{NO}_3)(\text{CatH})]^+ \rightarrow [\text{Cu}^{\text{I}}_2(\text{HL2})_2(\text{NO}_3)(3,5\text{-DTBQ})]^+$                             | 1.7                                 |
| $[\text{Cu}^{\text{I}}_2(\text{HL2})_2(\text{NO}_3)(3,5\text{-DTBQ})]^+ + \text{O}_2 \rightarrow [\text{Cu}^{\text{II}}_2(\text{HL2})_2(\text{NO}_3)(3,5\text{-DTBQ})(\text{O}_2)]^+$         | -3.8                                |
| $[\text{Cu}^{\text{II}}_2(\text{HL2})_2(\text{NO}_3)(3,5\text{-DTBQ})(\text{O}_2)]^+ \rightarrow [\text{Cu}^{\text{II}}_2(\text{HL2})_2(\text{NO}_3)(\text{O}_2)]^+ + 3,5\text{-DTBQ}$        | 6.9                                 |
| $[\text{Cu}^{\text{II}}_2(\text{HL2})_2(\text{NO}_3)(\text{O}_2)]^+ + \text{CatH}_2 \rightarrow [\text{Cu}^{\text{II}}_2(\text{HL2})_2(\text{NO}_3)(\text{O}_2)(\text{CatH}_2)]^+$            | -8.2                                |
| $[\text{Cu}^{\text{II}}_2(\text{HL2})_2(\text{NO}_3)(\text{O}_2)(\text{CatH}_2)]^+ \rightarrow [\text{Cu}^{\text{II}}_2(\text{L2})_2(\text{NO}_3)]^+ + 3,5\text{-DTBQ} + 2\text{H}_2\text{O}$ | -5.7                                |
